# **Dscam homophilic specificity is generated by high order *cis*-multimers coupled with *trans* self-binding of variable Ig1 in Chelicerata**

Fengyan Zhou<sup>1</sup>, Guozheng Cao<sup>1</sup>, Songjun Dai<sup>1</sup>, Guo Li<sup>1</sup>, Hao Li<sup>1</sup>, Zhu Ding<sup>1</sup>, Shouqing Hou<sup>1</sup>,  
Bingbing Xu<sup>1</sup>, Wendong You<sup>2</sup>, Feng Shi<sup>1</sup>, Xiaofeng Yang<sup>2</sup>, Yongfeng Jin<sup>1\*</sup>

<sup>1</sup>MOE Laboratory of Biosystems Homeostasis & Protection and Innovation Center for Cell Signaling Network, College of Life Sciences, <sup>2</sup>Department of Neurosurgery, First Affiliated Hospital, School of Medicine, Zhejiang University, Hangzhou, Zhejiang, ZJ310058, China

\* Correspondence should be addressed to Yongfeng Jin: 0086-571-88206479(Tel); 0086-571-88206478(Fax); [jinyf@zju.edu.cn](mailto:jinyf@zju.edu.cn) (e-mail).

Article Type: Research Article

Running Title: Chelicerata Dscams mediate homophilic recognition

Keywords: Down syndrome cell adhesion molecule; isoform diversity; alternative promoter; homophilic binding; multimer; combinatorial specificity; cell identity; self-recognition; self-avoidance; self–non-self discrimination; Chelicerata

## Abstract

By alternative splicing, *Drosophila Down syndrome cell adhesion molecule (Dscam1)* encodes tens of thousands of proteins required for establishing neural circuits, while Chelicerata encodes a family of ~ 100 shortened *Dscam* (sDscam) isoforms via alternative promoters. We report that Dscam isoforms interact promiscuously *in cis* to generate a vast repertoire of combinatorial homophilic recognition specificities in Chelicerata. Specifically, sDscams formed high order *cis*-multimers without isoform specificity involving the membrane-proximal fibronectin type III (FNIII) 1-3 and transmembrane (TM) domains and associated specifically *in trans* via antiparallel self-binding of the first variable immunoglobulin (Ig1) domain. We propose that such sDscam combinatorial homophilic specificity is sufficient to provide each neuron with a unique identity for self–non-self discrimination. In many respects, our results amazingly mirror those reported for the structurally unrelated vertebrate protocadherins (Pcdh) rather than for the closely related fly Dscam1. Thus, our findings blur the distinction between the neuronal self-avoidance of invertebrates and vertebrates and provide insight into the basic principles and evolution of metazoan self-avoidance and self–non-self discrimination.

## Introduction

Neuronal self-avoidance refers to the tendency of neurites from the same neuron to avoid each other, which is conserved in vertebrates and invertebrates and plays a vital role in neural circuit assembly<sup>1,2</sup>. Also, this process is mediated by strictly homophilic interactions between cell recognition proteins that trigger a neurite-repulsive rather than -adhesive signal. In turn, neuronal self-avoidance requires a molecular mechanism by which each cell discriminates self from non-self<sup>1,2</sup>. Thus, one challenge in deciphering the basis of self-avoidance is elucidating how neurons discriminate self from non-self. One solution to this challenge is to endow each neuron with a unique identity by expressing diverse families of cell adhesion molecules<sup>1,2,3</sup>.

In *Drosophila*, neuronal self-avoidance is mediated by extraordinary cell recognition molecules of the immunoglobulin superfamily, which are encoded by the *Down syndrome cell adhesion molecule* (*Dscam1*) locus via alternative splicing<sup>1,3</sup>. This vast repertoire of *Dscam1* recognition molecules is sufficient to bestow a unique molecular identity on each neuron and homophilic interaction specificity, thereby allowing neuronal processes to distinguish between self and non-self<sup>4,5</sup>. If neurites of the same neuron approach each other, neurites with identical *Dscam1* isoforms exhibit homophilic interactions, resulting in self-avoidance due to contact-dependent repulsion. By contrast, neurites from different neurons express distinct *Dscam1* protein repertoires that do not engage in homophilic binding and thus contact each other<sup>1,6</sup>.

Stochastic alternative splicing of *Drosophila Dscam1* enables it to encode up to 38,016 distinct isoforms, each of which comprises 1 of 19,008 distinct ectodomains linked to one of two alternative transmembrane regions<sup>7,8,9,10</sup>. Individual neurons stochastically express a

unique set of distinct *Dscam1* isoforms, which may engage in highly isoform-specific homophilic binding between neurons, thus endowing each neuron with a unique molecular identity<sup>4,5</sup>. *Dscam* isoform diversity plays essential roles in self-recognition and self-avoidance<sup>11, 12, 13</sup>. In contrast to insect *Dscam1*, vertebrate *Dscam* genes do not produce extensive protein isoforms, and functional studies revealed that mouse *Dscam* genes are not essential for neuronal self-avoidance<sup>14, 15</sup>.

However, another set of genes, the clustered *Pcdhs*, perform a similar function in vertebrates, and generate enormous cell-surface structural diversity<sup>1, 2, 3, 16</sup>. *Pcdhs* belong to the cadherin superfamily, the largest and best-established family of cell-adhesion molecules. In human and mouse, 53 and 58 *Pcdh* proteins are encoded by three tandemly arranged gene clusters of *Pcdh $\alpha$* , *Pcdh $\beta$* , and *Pcdh $\gamma$* , respectively<sup>17, 18</sup>. In contrast to fly *Dscam1*, the individual variable exon is preceded by an alternative promoter, and differential expression of *Pcdh* isoforms is achieved by a combination of stochastic promoter selection and alternative splicing<sup>19, 20, 21</sup>. Like fly *Dscam1* isoforms, almost all clustered *Pcdh* proteins engage in isoform-specific *trans* homophilic interactions<sup>22, 23</sup>. However, in contrast to fly *Dscam1* isoforms, which act as a monomer, *Pcdh* proteins act as multimeric recognition units to expand the adhesive interface<sup>22, 23, 24, 25, 26, 27, 28, 29</sup>, which provides a reasonable explanation for the different isoform number between vertebrate *Pcdh* and fly *Dscam1*. Deletion of the *Pcdh*  $\gamma$ -subcluster or all three clusters caused self-avoidance defects of dendrites and axons<sup>30, 31</sup>, positing that *Drosophila* *Dscam1* isoforms and vertebrate clustered *Pcdhs* employ similar strategies for self-avoidance. Also, vertebrate and *Drosophila* neurons have solved the self-avoidance problem based on a fundamentally similar principle albeit with a different set of recognition molecules.

Of particular relevance to the remarkable functional convergence of *Drosophila Dscam1* and vertebrate clustered Pcdhs is our recent discovery of a “hybrid” gene family in the subphylum Chelicerata. This gene family was composed of shortened *Dscam* genes with tandemly arrayed 5' cassettes, which encoded ~50–100 isoforms varying across various Chelicerata species via alternative promoter<sup>32,33</sup>. Since these Chelicerata Dscams lack the N-terminal Ig1–6, 10 domains and FNIII3–4, 6 domains present in classical DSCAM, we refer to this type of Dscam as shortened *Dscam* (sDscam) to distinguish it from classical Dscam. Based on their different variable 5' cassettes encoding one or two Ig domains, these sDscams can be subdivided into the sDscam $\alpha$  and sDscam $\beta$  subfamilies. Thus, all sDscam isoforms share the same domain structure but contain variable amino acid sequences within the N-terminal and two Ig domains in the extracellular region. Interestingly, the 5' variable region of Chelicerata *sDscams* shows remarkable organizational resemblance to that of vertebrate-clustered Pcdhs<sup>14,32,33</sup>. Similar to *Drosophila Dscam1* and vertebrate Pcdhs, Chelicerata *sDscam* are abundantly expressed in the nervous system<sup>32,33</sup>. Because Chelicerata sDscams are remarkably similar to *Drosophila Dscam1*, and exhibit a remarkable organizational resemblance to the vertebrate-clustered Pcdhs, with the latter two proteins both capable of mediating self-recognition and self-avoidance, we speculate that these sDscam isoforms play analogous roles in Chelicerata species. Therefore, a systemic examination of the homophilic recognition specificities of these clustered sDscam isoforms was performed to address their roles in specifying single-cell identity and neural circuit assembly.

In this study, we show that most clustered sDscams can engage in highly specific homophilic interactions via antiparallel self-binding of the variable Ig1 domain. Moreover, we

provide compelling evidence that sDscam isoforms can associate promiscuously as high order *cis*-multimers, which is mediated by the constant FNIII1–3 and transmembrane domains. Based on a large body of experimental evidence and structural modeling, we concluded that sDscams mediate self-recognition via promiscuous *cis* interactions coupled with strictly homophilic Ig1/Ig1 interactions in *trans*, possibly forming an interconnected latticed protein assembly between apposed cell surfaces. We propose that these sDscam homophilic specificities are sufficient to provide the unique single-cell identity necessary for neuronal self–non-self discrimination. Interestingly, in many respects, Chelicerata sDscams show more remarkable parallels with the genetically unrelated vertebrate Pcdhs than to the closely related fly Dscam1. Thus, our findings provide mechanistic and evolutionary insight into self–non-self discrimination in metazoans and enhance our understanding of the general biological principles required for endowing cells with distinct molecular identities.

## Results

### Cluster-wide analysis of sDscam-mediated homophilic interactions

The *Mesobuthus martensii* sDscam gene clusters encode diverse cell-adhesion proteins: 40 alternate sDscam $\alpha$  isoforms and 55 sDscam $\beta$ 1,  $\beta$ 2,  $\beta$ 3,  $\beta$ 4,  $\beta$ 5, and  $\beta$ 6 isoforms (Fig. 1a)<sup>32,33</sup>. To investigate whether sDscam isoforms mediate homophilic binding, we expressed the sDscam proteins in Sf9 cells using an insect baculovirus expression system (Fig. 1b). This system is a powerful tool for investigating homophilic interactions between cell surface adhesion molecules<sup>34</sup>. We prepared Sf9 cells expressing sDscam, as well as Sf9 cells infected with the parental virus as a negative control and expressing fly Dscam1 as a positive control.

Sf9 cells expressing constructs encoding full-length sDscam $\beta$ 6v2 ( $\beta$ 6v2FL-mCherry) or sDscam $\beta$ 6v2 lacking the cytoplasmic domain ( $\beta$ 6v2 $\Delta$ cyto-mCherry) exhibited strong cell aggregation (Supplementary Fig. 1a), indicating that the homophilic interaction was mediated by sDscam $\beta$ 6v2 *in trans* independently of the cytoplasmic region. Because our results indicated that deletion of the cytoplasmic tail of sDscam did not significantly affect the formation of cell aggregates (Supplementary Fig. 1a), we used  $\Delta$ cyto constructs for all sDscam proteins in the cell aggregation assay.

Except for a few sDscam cDNAs that failed to be cloned possibly due to low expression, we performed a systematic analysis of the homophilic interactions of 85 of the 95 sDscam proteins (sDscam $\alpha$ , sDscam $\beta$ 1– $\beta$ 6). We found that the feature or size of the cell aggregates varied markedly across sDscam subfamilies (Fig. 1c, d, Supplementary Fig. 1b). Cells expressing each alternate sDscam $\alpha$  showed extensive aggregation for all isoforms tested (Fig. 1d, lane 1-3). By contrast, cells expressing most of the alternate sDscam $\beta$ 1– $\beta$ 4 isoforms failed to form aggregates, except for a few isoforms (Fig. 1d, lane 4-7). In particular, none of the alternate sDscam $\beta$ 1 or  $\beta$ 4 isoforms formed aggregates. Moreover, the aggregates of cells expressing sDscam $\beta$  isoforms were smaller than those expressing sDscam $\alpha$ s (Fig. 1d, Supplementary Fig. 1b). These observations suggest that the ability of each sDscam isoform to mediate homophilic aggregation differs in a cluster-specific manner.

Notably, cells expressing individual sDscam isoforms from the same cluster, which differed only in the N-terminal variable region, exhibited markedly different cell aggregation activity. For example, sDscam $\beta$ 2v6 and  $\beta$ 2v8 formed homophilic aggregates, but other members of the sDscam $\beta$ 2 subfamily did not (Fig. 1d, lane 5). Similar results were obtained

when assaying individually sDscam $\beta$ 3 and  $\beta$ 5 isoforms (Fig. 1d, lane 6, 8). This discrepancy in the aggregation activity between isoforms from the same or different clusters was likely the consequence of differences in the expression, membrane localization, or intrinsic *trans*-binding affinities of individual sDscam isoforms<sup>23</sup>. Failure to form cell aggregates in mammalian Pcdh $\alpha$  isoforms is reportedly due to the lack of membrane localization<sup>23, 35, 36</sup>. However, this can be ruled out because immunostaining indicated that sDscam $\beta$ 4v3 was present on the surface of Sf9 cells, as was sDscam $\alpha$ 14 (Supplementary Fig. 1c, panels i and iii). Therefore, we speculate that the different aggregation activities likely reflect, at least in part, differences in the intrinsic *trans* homophilic binding affinities of the individual isoforms.

### **The first two N-terminal Ig domains are required for homophilic *trans* binding**

To explore how sDscam proteins mediated differential homophilic *trans*-binding, we firstly defined the minimum domain required for homophilic interactions. To this end, a series of N-terminal truncations of the extracellular domain of *sDscama*14 fused with mCherry were subjected to cell aggregation assay (Fig. 2a). We did not observe cell aggregation for each of these deletion constructs in which the first one to five domains were successively deleted from sDscam $\alpha$ 14 (Fig. 2a, panels ii-vi). Similarly, all constructs lacking the Ig1 domain did not show aggregation for sDscam $\beta$ 3v3 and  $\beta$ 6v1 (Fig. 2a, panels viii-xii, Supplementary Fig. 2a, panels 2-6). Of all the truncated mutants in three independent assays, homophilic binding activity was dependent on the presence of the Ig1 domain (Fig. 2b). These results indicate that the first N-terminal domain (Ig1) is required for sDscam-mediated homophilic *trans* binding.

We produced a series of truncations in which extracellular domains were successively



deleted starting with the membrane-proximal FNIII3 domain (Fig. 2c). These truncations harboured one sDscam $\alpha$  and seven sDscam $\beta$  isoforms, four of which were derived from two clusters, enabling comparison of various isoforms from the same cluster or from different clusters (Fig. 2c, Supplementary Fig. 2a). Representative examples of truncation are shown for sDscam $\alpha$ , sDscam $\beta$ 1v2, and  $\beta$ 4v1 in Fig. 2c. Five additional examples for sDscam $\beta$ 3v3,  $\beta$ 4v3,  $\beta$ 5v10,  $\beta$ 6v1, and  $\beta$ 6v2 are shown in Supplementary Fig. 2a. With the exception of the sDscam $\beta$ 1v2 truncated constructs, all of which did not induce cell aggregation as the complete ectodomains, at least one truncated construct containing the first two N-terminal Ig domains mediated cell aggregation for each sDscam tested (Fig. 2c, panels i–xviii, Supplementary Fig. 2a, panels 7–36), while all truncated constructs containing only the Ig1 domain did not (Fig. 2c, panels vi, xii and xviii, Supplementary Fig. 2a, panels 12, 18, 24, 30 and 36). These results indicate that the smallest protein that exhibited *trans* interaction contains two N-terminal Ig1–2 domains (Fig. 2c, d, Supplementary Fig. 2a), compatible with the fact that the variable Ig1 domain (possibly in combination with Ig2) acted as a *trans*-binding interface (see results below). Thus, the first two N-terminal Ig domains are essential for sDscam-mediated homophilic *trans* binding.

### **Homophilic *trans*-binding is associated with the constant extracellular and transmembrane domains of sDscam**

Based on data from eight independent assays with successive truncation from the membrane-proximal extracellular domain (Fig. 2c, Supplementary Fig. 2a), we observed three different changes in aggregation. First, cell aggregation was gradually decreased as the number of domains deleted increased in most sDscam isoforms tested, such as sDscam $\alpha$ 14, sDscam $\beta$ 5v10,

$\beta 6v1$ , and  $\beta 6v2$  (Fig. 2c, panels i–vi, Supplementary Fig. 2a, panels 19–36). In these cases, constant domains might enhance sDscam-mediated homophilic *trans* binding. Second, deletion of two or three membrane-proximal FNIII domains in sDscam $\beta 4v1$  and  $\beta 4v3$  rescued their cell aggregation activity, more efficiently in  $\beta 4v1\Delta FNIII1-3$  and  $\beta 4v3\Delta FNIII1-3$  (Fig. 2c, panels xiii–xviii, Supplementary Fig. 2a, panels 13–18). These observations suggest that the FNIII domains of sDscam $\beta 4$  inhibit homophilic *trans* binding. Third, we found that sDscam $\beta 1$  homophilic interactions could not be rescued by deletion of any domain (Fig. 2c, panels vii–xii). Therefore, the constant domains may be associated with homophilic binding in a cluster-specific manner.

Interestingly, the change in cell aggregation varies markedly upon domain truncation even between isoforms from the same cluster. For example, we observed cell aggregates in  $\beta 6v2\Delta FNIII2-3$ ,  $\beta 6v2\Delta FNIII1-3$ , and  $\beta 6v2\Delta Ig3-FNIII3$ , but not in their  $\beta 6v1$  counterparts (Supplementary Fig. 2a, panels 27–29 and 33–35). Similarly,  $\beta 4v3\Delta Ig3-FNIII3$ , but not  $\beta 4v1\Delta Ig3-FNIII3$ , exhibited aggregation activity (Fig. 2c, panel xvii, Supplementary Fig. 2a, panel 17). This suggests that the constant domains influence homophilic *trans* binding by coupling with variable domains.

To further investigate how the constant extracellular domains contribute to homophilic *trans* binding, we performed experiments in which domains were shuffled between sDscam $\alpha 14$ , which binds, and sDscam $\beta 4v1$ , which does not (Fig. 2e). Constructs in which the extracellular domain of sDscam $\alpha 14$  was replaced by the corresponding domain of sDscam $\beta 4v1$ , or *vice versa*, were produced and tested for cell aggregation activity (Fig. 2e, f). As a result, replacing the Ig2–FNIII3 or Ig3–FNIII3 constant domains of sDscam $\beta 4v1$  with the corresponding region of

sDscam $\alpha$ 14 caused homophilic binding, while chimeric constructs containing the FNIII1–3 or less-constant domains of sDscam $\alpha$ 14 did not show homophilic binding (Fig. 2e, f, panels i–vi). By contrast, replacing the FNIII1–3 or more-constant domains of sDscam $\alpha$ 14 by the corresponding region of sDscam $\beta$ 4v1 failed to induce cell aggregation, while chimeric constructs containing the FNIII2–3 or FNIII3 domain of sDscam $\beta$ 4v1 resulted in cell aggregation (Fig. 2e, f, panels xi–xvi). The fact that both truncated and shuffled constructs derived from sDscam $\beta$ 4v1 could mediate homophilic interactions indicates that there is no inherent physical barrier, such as binding incompatibility at the *trans* interface, preventing homophilic recognition of these proteins (Fig. 2c, panels xv and xvi, Fig. 2f, panel i and ii). Taken together, these data demonstrate that, in addition to matching between the N-terminal variable domains, the constant domains may affect homophilic *trans* binding.

To further determine which extracellular domain contributed to homophilic *trans* binding, we carried out chimeric mutation experiments in which a single domain was shuffled between sDscam $\alpha$ 14 and sDscam $\beta$ 4v1. Replacement of the Ig3 or FNIII1 domain of sDscam $\beta$ 4v1 by the corresponding region of sDscam $\alpha$ 14 caused detectable homophilic binding (Fig. 2f, panels viii and ix). Conversely, individual replacement of the Ig3–FNIII2 of sDscam $\alpha$ 14 by the corresponding domain of sDscam $\beta$ 4v1 decreased or even abolished homophilic binding activity (Fig. 2f, panels xvii–xix). Therefore, the Ig3 and FNIII1 domains play an important role in homophilic *trans* binding. Similar domain shuffling experiments were performed between sDscam $\alpha$ 14 and sDscam $\beta$ 1v1 (Supplementary Fig. 2b). However, individual or combined replacement of the constant extracellular domain of sDscam $\beta$ 1v1 by the corresponding region of sDscam $\alpha$ 14 did not cause detectable aggregation (Supplementary Fig. 2b, panels 3–7). Taken

together, these results show that the constant extracellular domains contributed to regulating homophilic *trans* binding in a cluster-specific manner.

In addition, we performed domain-shuffling experiments between another sDscam pair: sDscam $\alpha$ 39 (very strong homophilic binding) and sDscam $\beta$ 3v2/v3 (no or weak homophilic binding) (Fig. 2g, Supplementary Fig. 2c). These shuffling experiments not only identify the extracellular domain that contributes to the homophilic *trans* binding activity of a chimera but also indicate that the TM region is involved in homophilic binding (Fig. 2g, Supplementary Fig. 2c). Strikingly, replacement of the TM domain of sDscam $\alpha$ 39 by that of sDscam $\beta$ 3 significantly decreased homophilic binding activity (Fig. 2g, panels i–ii). Conversely, replacement of the transmembrane domain of sDscam $\beta$ 3v2 with the corresponding region of sDscam $\alpha$ 39 caused detectable aggregation (Fig. 2g, panels iii–iv). Likewise, replacement of sDscam $\beta$ 3v3 with the transmembrane domain of sDscam $\alpha$ 39 significantly increased aggregation (Fig. 2g, panels v–vi). However, replacement of sDscam $\beta$ 4v1 by the transmembrane domain of sDscam $\alpha$ 14 did not affect its aggregation, and *vice versa* (Fig. 2e, f, panels vi versus x, and xvi versus xx). These results indicate that the transmembrane domain contributes to homophilic *trans* binding, at least in some sDscams.

Overall, the domain-swapping results, together with the domain-truncation experiments (Fig. 2a, c, Supplementary Fig. 2a), suggest that the extracellular and transmembrane domains might be involved in homophilic *trans* binding, with the relative contributions of each domain varying among the sDscam clusters.

## **sDscams exhibit highly isoform-specific binding**

To analyze the specificity of interaction between different sDscams as well as isoforms differing in the 5' variable Ig domains, we assessed cell aggregates formed by mixing two fluorescently labeled cell populations (Fig. 3a). Each sDscam was expressed with mCherry or enhanced green fluorescent protein (EGFP) fused to the C-terminus and assayed for binding specificity. We first investigated the specificity of the interaction between sDscam $\alpha$  isoforms, which differ in the Ig1 domain at the N-terminus. To determine the stringency of recognition specificity, we generated pairwise sequence identity heat maps of the variable Ig1 domains (Fig. 3b). Using these heat maps, we identified sDscam pairs with the highest pairwise sequence identity within their Ig1 domains. Fourteen of the closely related sDscams (>87% identity, Fig. 3b) were tested together with 21 more distantly related sDscams (Fig. 3c). In total, we tested 35 unique pairs of sDscams with sequence identity for non-self pairs ranging from 50–97% in the Ig1 domains. For most sDscam $\alpha$  pairs, only self-pairs on the matrix diagonals exhibited intermixing of red and green cells, while all non-self pairs formed separate, noninteracting homophilic cell aggregates (Fig. 3c–3e, Supplementary Fig. 3a). Identical results have been obtained for reciprocal binding pairs. These data indicate that the first variable Ig domain of sDscam $\alpha$  is sufficient to determine binding specificity.

However, heterophilic binding occurred between closely related variable domains. For example, sDscam $\alpha$ 20 and sDscam $\alpha$ 36 (96.8% sequence identity in their Ig1 domains) showed remarkable heterophilic binding (Fig. 3f). A comparative analysis indicated that the thresholds for homophilic and heterophilic binding were  $\sim$  96% sequence identity in the Ig1 domains of sDscam $\alpha$  pairs (Fig. 3g). We identified only one example of heterophilic binding among the 35

Ig1 pairs. Thus, the vast majority of the sDscam $\alpha$  isoforms exhibited strict homophilic *trans* binding.

Next, we investigated the specificity of the interactions between sDscam $\beta$  isoforms, which differ in their Ig1–2 domains at the N-terminus. We generated pairwise sequence identity heat maps of the Ig1–2 domains and found that only one sDscam $\beta$  pair shared more than 90% sequence identity between the Ig1 domains (Supplementary Fig. 3b). Because these isoforms did not support homophilic binding when individually assayed, we were unable to assess their binding specificity. In total, we tested 10 pairs of sDscam $\beta$ / $\beta$  and sDscam $\alpha$ / $\beta$ , respectively. All of the sDscam $\beta$ / $\beta$  and  $\alpha$ / $\beta$  pairs tested bound strictly homophilically (Supplementary Fig. 3c, d). Taken together with the results of sDscam $\alpha$  analysis (Fig. 3), these observations demonstrated a highly homophilic interaction between sDscam $\alpha$  and sDscam $\beta$  isoforms.

### **Domain shuffling identifies variable Ig1 as key specificity-determining domains**

In contrast to sDscam $\alpha$ s, sDscam $\beta$ s contain two variable Ig domains at the N-terminus. To identify the variable domain responsible for the specificity of *trans* interactions between different sDscam $\beta$  isoforms, we constructed a series of Ig-domain swapping chimeras between sDscam $\beta$ 5v4 and  $\beta$ 5v10 isoforms within the same cluster (Fig. 4a). The two isoforms have 46.7% amino acid sequence identity within their variable Ig1 domains. As a result, a chimeric construct encoding sDscam $\beta$ 5v4 with its Ig1 domain replaced by that of sDscam $\beta$ 5v10 no longer interacted with its parent sDscam $\beta$ 5v4, but interacted with sDscam $\beta$ 5v10 (Fig. 4a, panels ii and iv, Supplementary Fig. 4b). By contrast, a chimeric construct encoding sDscam $\beta$ 5v4 with its Ig2 domain replaced by that of sDscam $\beta$ 5v10 still interacted with its parent sDscam $\beta$ 5v4, but

not with sDscam $\beta$ 5v10 (Fig. 4a, panels i and iii). Identical results were obtained by Ig domain swapping between sDscam $\beta$ 5v8 and  $\beta$ 5v10 (Fig. 4a, panels v-viii), and sDscam $\beta$ 5v5 and  $\beta$ 5v10 (Supplementary Fig.4c). Therefore, the first Ig domain of sDscam $\beta$  is the primary determinant of *trans* interaction specificity.

Conversely, is a single common Ig1 domain sufficient to confer co-aggregation between sDscam $\beta$  isoforms? To determine this, we performed domain swapping between different sDscam $\beta$  subfamilies, which differ in both the variable and constant regions (Fig. 4b). A cell aggregation assay indicated that a chimeric construct encoding sDscam $\beta$ 6v1 with its Ig1 domain replaced by that of sDscam $\beta$ 5v10 interacted with sDscam $\beta$ 5v10 (Fig. 4b, panel iv), and *vice versa* (Fig. 4b, panel viii). A similar result has been observed for domain swapping between sDscam $\alpha$  and sDscam $\beta$  subfamilies (Fig. 4c). In this case, cells expressing a chimeric construct encoding sDscam $\beta$ 3v3 with its Ig1 domain replaced by that of sDscam $\alpha$ 39 co-aggregated with cells expressing sDscam $\alpha$ 39 (Fig. 4c, panel ii), and *vice versa* (Fig. 4c, panel viii). These domain swapping experiments between different sDscam subfamilies indicate that a single same Ig1 domain is sufficient for mediating *trans* binding specificity, at least for the sDscam isoform pairs tested. Conversely, these observations also showed that the constant region of sDscam might not be involved in defining its binding specificity. These data further support a key role for the Ig1 domain in determining the *trans* interaction specificity.

### **sDscams interact in *trans* via antiparallel Ig1 self-binding**

To gain insight into how the variable Ig1 domain mediates homophilic binding specificity, we carried out homology modeling studies to generate homodimeric complexes of sDscam $\alpha$  Ig1

variants. Based on the crystal structure of variable Ig7 of fly Dscam1<sup>37,38</sup>, we built an Ig1 homodimeric model of sDscam $\alpha$ 30 with the SWISS-MODEL program and showed that sDscam $\alpha$  might adopt an antiparallel self-binding fashion of Ig1/Ig1 (Fig. 5a)<sup>39,40</sup>. Furthermore, docking modeling of each sDscam $\alpha$  revealed that there was a complementary electrostatic potential surface pattern on the ABDE face: positive at one end and negative at the other (Fig. 5a). In this interface docking model, the positive residues might interact with neighboring negative residues to form a salt bridge in the ABDE face. For instance, residue 5 lysine (K) (sDscam $\alpha$ 30 Ig1 numbering) in the A strand and residue 12 aspartic acid (D) in the AB loop region are in close structural proximity at the homophilic binding interface, and thus may form a salt bridge (Fig. 5a).

To confirm this, we performed single and double complementary mutations of these candidate residues and assessed their ability to mediate cell aggregation. As a result, a single K mutation of residue 5 in the A strand or a D mutation of residue 12 in the AB loop region weakened cell aggregation (Fig. 5b, panel ii and iii). These results indicate that residue K5 in the A strand and residue D12 in the AB loop region are necessary for efficient self-recognition of sDscam $\alpha$ 30. Interestingly, double K/D mutants (K5D; D12K), which are thought to reform a salt bridge at the interface, partially restored cell aggregation (Fig. 5b, panel iv), validating an antiparallel self-binding mode of Ig1/Ig1. Therefore, the Ig1 domains of sDscam $\alpha$  adopt an antiparallel self-binding conformation.

### **Identification of sDscam Ig1 specificity-determining residues**

We next identified the Ig1 specificity-determining residues by structural modeling and



mutagenesis studies. Candidate specificity-determining residues were predicted using the closely related Ig1 of sDscam (Supplementary Fig. 5a). Because the homophilic binding specificity of fly Dscam1 Ig7, a Chelicerata sDscam Ig1 homologue, is largely determined by electrostatic and symmetry axis residues<sup>37, 38</sup>, different residues between each pair were screened based on their electrostatic and shape complementarity. A remarkable example is the closely related  $\alpha20/\alpha36/\alpha30$  pairs, in which sDscam $\alpha36$  exhibited robust heterophilic binding to sDscam $\alpha20$  but no heterophilic binding to sDscam $\alpha30$  (Fig. 3f). Four amino acids were different between the Ig1 domains of  $\alpha30$  and  $\alpha36$ ; however, only residue 22 of the B sheet, which resided at the symmetry axis, was predicted to influence shape complementarity (Fig. 5c, panel i). Therefore, we speculate that this residue is a candidate specificity determinant.

To confirm this, we swapped them between isoforms and examined the binding specificities of the swapped isoforms and their parents (Fig. 5c, panel ii). Swapping residue 22(T/I), but not the other three residues (1S/P, 15S/N, and 21V/I), switched the *trans* binding specificity between sDscam $\alpha30$  and sDscam $\alpha36$  (Fig. 5c, panel ii and iii). Cells expressing a swapped sDscam $\alpha30$  isoform in which residue 22T was replaced with 22I from sDscam $\alpha36$  and sDscam $\alpha20$  intermixed with cells expressing sDscam $\alpha36$  and sDscam $\alpha20$  (Fig. 5c, panel iii). By contrast, these cells segregated from those expressing the parent isoform from which the swapped residue derived, and *vice versa*. Thus, a single residue is sufficient to determine binding specificity in some sDscam $\alpha$  pairs.

However, swapping residue 22(I/T) of Ig1 between sDscam $\alpha11$  and  $\alpha15$ , or between sDscam $\alpha13$  and  $\alpha15$ , did not swap binding specificity but instead produced novel homophilic binding specificity (Supplementary Fig.5c). These observations suggest that additional residues

at the Ig1/Ig1 interface also contribute to binding specificity. By swapping interface residues that differed between other pairs of Ig1 variants ( $\alpha 11$  and  $\alpha 13$ ;  $\alpha 23$  and  $\alpha 27$ ), the symmetry axis residue 52 (M/V; L/V) of the D sheet was shown to alter, but not swap, the binding specificity (Supplementary Fig.5e). In the latter case ( $\alpha 27/\alpha 23$ ), separate green and red homophilic aggregates are formed, but they now adhere to one another (Supplementary Fig.5e, panel 18 and 20). By contrast, swapping residue 26 (N/I) between  $\alpha 11$  and  $\alpha 13$ , which was neither electrostatic nor located at the symmetry axis, did not alter the binding specificity (Supplementary Fig.5d). Collectively, these data indicate that residues 22 of the B sheet and 52 of the D sheet act as specificity determinants, at least for some pairs of sDscam isoforms.

Another representative example of specificity swapping is shown for the  $\alpha 21/\alpha 37$  pair (Fig. 5d). In the  $\alpha 21/\alpha 37$  pair, three different residues (5, 10&56) were filtered as candidate specificity determinants, one of which interacted at the antiparallel self-binding interface by double complementary mutations (Fig. 5b). We found that swapping one of the three different residues (5, 10&56) between sDscam $\alpha 21$  and  $\alpha 37$  did not swap binding specificity (Fig. 5d, panel iii, Supplementary Fig. 5g). By contrast, swapping of all three residues of sDscam $\alpha 21$  to those of sDscam $\alpha 37$  swapped the binding specificity (Fig. 5d, panel iii). Conversely, swapping two of the three residues partially or completely altered the binding specificity between sDscam $\alpha 21$  and  $\alpha 37$  (Fig. 5d, Supplementary Fig. 5g). Similarly, swapping of all three residues 6, 19 and 52 between sDscam $\alpha 23$  and  $\alpha 27$  fully switched the binding specificity (Supplementary Fig. 5f). Therefore, these residues are involved in determining binding specificity. This may also, at least in part, mirror Ig1 diversification during sDscam evolution, where initial mutations after exon duplication could lead to promiscuous binding and additional

combinatorial mutations could eventually produce a highly specific homophilic interaction distinct from their parents.

In summary, by structural modeling and mutagenesis studies, we identified specificity-determining residues for sDscam isoforms (Supplementary Fig. 5b). These residues frequently resided at the center or side-chain of symmetric homo-dimerized interfaces, which exhibit electrostatic and shape complementarity between the ABED interface strands. As the six pairs of variable Ig domains used in these residue swapping experiments are not closely related (Supplementary Fig.5a), these interface residues likely contribute to determining homophilic specificity for other sDscam isoforms as well.

### **sDscams form high order *cis*-multimers independent of their *trans* interactions**

Having established that sDscam isoforms are mediated by an Ig1/Ig1 antiparallel self-binding between apposed cell surfaces, we attempted to explain how sDscam isoform diversity mediates self-recognition in Chelicerata. As estimated by the number of Ig1 or its orthologues, the number of Dscam isoforms is in the range of  $\sim 100$  across the Chelicerata species<sup>32</sup>, at least two orders of magnitude lower than that in flies. Moreover, as shown above (Fig. 1), almost half of sDscam isoforms, when expressed individually, failed to engage in homophilic interactions in the cell aggregation assay (Fig. 1d). Therefore, the small number of sDscam isoforms in Chelicerata alone cannot account for its non-self-discrimination as for the homophilic interaction model in *Drosophila* Dscams. Thus, how do these nonclassical sDscam isoforms mediate homophilic interactions? Given the striking organizational resemblance

between the scorpion *sDscams* and mammalian *Pcdhs*, we speculate that via *cis*-multimers scorpion sDscams function as vertebrate-clustered Pcdh isoforms<sup>22,23,29</sup>.

To confirm this hypothesis, we first performed coimmunoprecipitation (co-IP) analyses to investigate the interactions between sDscam isoforms *in vitro* (Fig. 6a). When HA-sDscam $\beta$ 6v2 and Myc-sDscam $\beta$ 6v2 are coexpressed by coinfecting with individual recombinant viruses, Myc-tagged proteins could strongly coimmunoprecipitate with HA- $\beta$ 6v2 (Fig. 6b). Further co-IP experiments indicate that sDscam proteins from different subfamilies tested interacted strongly with each other (Fig. 6b, Supplementary Fig. 6a), exhibiting no specificity between different isoforms. Because sDscam $\alpha\Delta$ Ig1 $\Delta$ TM could interact with other sDscam $\Delta$ Ig1 or sDscam $\Delta$ Ig1-2 mutants (Supplementary Fig. 6b), in which Ig1-domain deletion has ablated homophilic *trans* interactions, robust co-IP between HA-sDscam and Myc-sDscam should not result from *trans* interactions, but *cis* interactions. These results demonstrate that sDscams interacted with each other in *cis* with almost no specificity between different isoforms.

To further characterize the *cis* interaction between sDscam isoforms, we performed multimer analysis by western blotting in the absence or presence of reducing agents. In reducing SDS/PAGE gels, sDscam $\beta$ 6v2 migrated with a single molecular weight of  $\sim 80$  kDa, which corresponded to the size of the monomer (Fig. 6c). Under non-reducing conditions, however, several large bands migrated behind the monomer, which corresponded to the size of sDscam assembly of putative dimer, tetramer, and larger multimers (Fig. 6c). Notably, all sDscam assembly sizes were a multiple of the dimer, suggesting that the dimer acts as a basic recognition unit for sDscam, and clusters into tetramer and higher order oligomeric complexes.

Similarly, we performed multimerization analysis by expressing proteins of all other sDscam $\alpha$  and sDscam $\beta$ 1– $\beta$ 5 subfamilies. We observed multimerization to different extents in all sDscam proteins investigated, suggesting that sDscam proteins from different subfamilies are able to homo-multimerize (Fig. 6d, panel i). In these cases, we found that individual sDscam isoforms from the same cluster (i.e., sDscam $\alpha$ 1,  $\alpha$ 14,  $\alpha$ 25) exhibited largely similar multimerization behavior, which varied markedly among the sDscam proteins from different subfamilies. Furthermore, we have observed abundant endogenous sDscam $\beta$ 6v2 multimers in the cephalothorax of scorpion (Fig. 6d, panel ii). Taken together, our results demonstrate that sDscams can form strong multimers *in vivo*.

It is possible that sDscam multimers result from *trans* interactions in an antiparallel orientation (Fig. 6a). However, sDscam $\beta$ 1v2 and  $\beta$ 4v1, which did not show homophilic *trans* interactions in cell aggregation assays, still exhibited robust multimers (Fig. 6d, panel i). Moreover, Ig1–2 domain deletions, which ablated homophilic *trans* interactions, still exhibited strong multimerization (Fig. 6e, panel i). Therefore, sDscam *cis* interactions occurred even in the absence of *trans* interactions. To preclude the effect of sDscam size on multimerization, we performed single amino acid mutations in the Ig1 domain of sDscams and examined the effect on multimerization (Fig. 6e, panel ii). Single mutations, which disrupted homophilic *trans* interactions in a cell aggregation assay, heightened multimerization (Fig. 6e, panel ii). These results support the notion that sDscams multimerized in *cis* independently of their *trans* interactions and indicate that robust sDscam multimers result from *cis* interactions.

### **sDscam *cis* multimerization is mediated by the extracellular FNIII1–3 domains**

To elucidate how sDscams form high order *cis*-multimers, we constructed a series of truncations of the extracellular domain of sDscam $\beta$ 6v2 fused with a Myc-tag for *cis* multimerization assay by sequentially deleting the domain from the N-terminus (Fig. 6f). We found that the truncated proteins lacking Ig1 ( $\beta$ 6v2 $\Delta$ Ig1), Ig1–2 ( $\beta$ 6v2 $\Delta$ Ig1–2), and Ig1–3 ( $\beta$ 6v2 $\Delta$ Ig1–3) exhibited robust multimerization (Fig. 6f, panel i, lane 2–4). Notably, the truncated proteins lacking Ig1, Ig1–2, and Ig1–3 exhibited multiple bands, which corresponded to the size of sDscam assembly putative dimers, tetramer, hexamer, octamer, and larger multimers as the entire extracellular domain, respectively (Fig. 6f, panel i). Therefore, the absence of Ig1, Ig1–2, and Ig1–3 did not influence the assembly pattern of multimerization. Importantly, based on the unaltered assembly pattern of multimers in a series of successively truncated proteins, we reason that sDscams are assembled into *cis*-dimer and higher-order multimeric complexes in a parallel orientation (Fig. 6f, panel ii). Furthermore, sDscam mutants lacking Ig1–2 or Ig1–3 exhibited the most heightened *cis* multimerization (Fig. 6f, arrows in panel i). Together, these data strongly suggest that the Ig1–3 domains of sDscam are dispensable for *cis* interactions, and that membrane-proximal FNIII1–3 domains are sufficient for efficient *cis* multimerization.

However, when reduced to one or two membrane-proximal FNIII domains, the resulting constructs (i.e.,  $\beta$ 6v2 $\Delta$ Ig1–FNIII1 and  $\beta$ 6v2 $\Delta$ Ig1–FNIII2) exhibited markedly reduced multimerization (Fig. 6f, lane 5, 6). Because these constructs contained the same transmembrane domain, the discrepancy between them is likely due to the presence of different FNIII domains. To further identify the extracellular domains of sDscam that contribute to *cis* multimerization, we constructed mutants encoding a single or two continuous extracellular

domains with an HA tag and co-transfected them with sDscam $\beta$ 6v2 (Fig. 6g). Co-IP experiments revealed that the deletion constructs containing individual or multiple continuous FNIII domains were capable of binding to sDscam $\beta$ 6v2 (Fig. 6g, panel i, Supplementary Fig. 6c), indicating that sDscam $\beta$ 6v2 can interact with each FNIII domain. This observation was supported by *cis* multimerization assays, which showed that each of the truncated  $\beta$ 6v2 proteins could form strong *cis*-multimers (Fig. 6g, panel ii). These data indicate that *cis* multimerization is jointly mediated by all three membrane-proximal FNIII1–3 domains. This result is also consistent with computational modeling using the ZDOCK server <sup>41</sup>, by which sDscam $\beta$ 6v2 could form a homodimer via multiple parallel interfacial regions involving the FNIII1–3 domains (Supplementary Fig. 6d). Because the sDscam $\beta$ 6v2 FNIII1–3 domains lack cysteine residues, they likely mediate *cis* multimerization by noncovalent mechanisms.

We subsequently carried out multimerization assays of all other sDscam $\alpha$  and sDscam $\beta$ 1– $\beta$ 5 proteins by truncating the extracellular domain as for sDscam $\beta$ 6v2. Representative examples of multimerization truncation are shown for sDscam $\alpha$ 14, sDscam $\beta$ 1v2, sDscam $\beta$ 2v6, and sDscam $\beta$ 5v2 in Supplementary Fig. 6e. Consistent with sDscam $\beta$ 6v2, the absence of the N-terminal Ig1–3 domains increased the extent of *cis* multimerization in almost each sDscam (arrows in graph of Supplementary Fig. 6e). These observations suggest that the membrane-proximal FNIII1–3 domains of sDscams are sufficient for efficient *cis* multimerization. However, when deleting the FNIII domains, individual sDscams from different subfamilies exhibited different patterns of alteration of multimerization (Supplementary Fig. 6e). For instance, the FNIII2–3 peptide (i.e.,  $\beta$ 5v2 $\Delta$ Ig1–FNIII1) exhibited similar multimerization to the FNIII1–3 peptide ( $\beta$ 5v2 $\Delta$ Ig1–3) in sDscam $\beta$ 5v2 (Supplementary Fig. 6e, panel iv, lane 4, 5),

while the FNIII2–3 peptide (i.e,  $\beta 6v2\Delta Ig1-FNIII1$ ) exhibited much less multimerization than the FNIII1–3 peptide ( $\beta 6v2\Delta Ig1-3$ ) in sDscam $\beta 6v2$  (Fig. 6f, panel i, lane 4, 5). This suggests that the contribution of individual FNIII domains to *cis* interactions differs markedly among sDscams. Taken together, our results indicate that all three membrane-proximal FNIII1–3 domains engage in *cis* multimerization of sDscams.

In summary, our data reveal that all three membrane-proximal FNIII1–3 domains engaged in high order *cis* multimerization, while the first N-terminal Ig1–3 domains were dispensable for *cis* interactions in all sDscams investigated. Notably, despite their general promiscuity, all FNIII1–3 domains of sDscam may contribute to *cis* interactions, with the relative contributions of each domain to *cis* multimerization varying from one sDscam cluster to another.

### **Transmembrane domain promotes the formation of sDscam *cis*-multimers**

We subsequently investigated whether and how the transmembrane (TM) domain of sDscam contributes to high-ordered *cis* multimerization. To this end, we first examined how TM deletion affected self-multimerization of sDscam. Each of the truncated proteins lacking the TM domain was capable of multimerizing, indicating that the extracellular domain is sufficient to confer efficient *cis* multimerization (Fig. 6h, Supplementary Fig. 6f). However, the multimerization efficiency was markedly reduced in most sDscam $\Delta TM$  mutants (arrows in Fig. 6h, Supplementary Fig. 6f). For example, dimer and tetramer were reduced in sDscam $\alpha\Delta TM$ , while tetramer was almost undetectable in  $\beta 6v2\Delta TM$  (Fig. 6h, panel i). Overall, these data demonstrate that although the extracellular region alone might engage in the formation of multimers *in cis*, the presence of the transmembrane domain greatly enhances the accuracy and



efficiency of sDscam *cis* multimerization.

To further determine the role of the TM domain in *cis* multimerization, we examined whether sDscam transmembrane peptides, in the absence of regulation by soluble domains, have the propensity for self-multimerization. When the expressed transmembrane peptides were treated in the absence or presence of reducing agents, we observed dimerization of the transmembrane peptides expressed from all six sDscams investigated (Fig. 6h, panel ii), while the addition of reducing agents precluded dimer formation. These observations indicate that the presence of the transmembrane domain alone is sufficient to confer efficient *cis* dimerization in each sDscam. However, we have not observed higher order multimers (i.e., tetramer, hexamer) for sDscam transmembrane peptides as extracellular proteins. Notably, although individual transmembrane peptides from all sDscams engaged in dimerization, the efficiency of dimerization varied remarkably among them, with the greatest efficiency for sDscam $\alpha$  and sDscam $\beta$ 6 and the least for sDscam $\beta$ 4 and sDscam $\beta$ 5 (Fig. 6h, panel ii). By contrast, TM peptides from sDscam $\beta$ 4 and sDscam $\beta$ 5 accounted for less than 10% of dimers (Fig. 6h, panel ii). These results further implicate the transmembrane domain in sDscam *cis* multimerization.

To further explore how the transmembrane domain promotes sDscam *cis* multimerization, we analyzed the roles of transmembrane residues using SWISS-MODEL<sup>39, 40</sup>. As expected from sequence-based  $\alpha$ -helical transmembrane prediction tools, several of the residues in the membrane form a contiguous helix in sDscam $\beta$ 6v2, which have a propensity to dimerize via covalent or noncovalent interactions (Supplementary Fig. 6g, panel i). Notably, the transmembrane of some sDscams (i.e, sDscam $\beta$ 2,  $\beta$ 3), which did not contain cysteine residues, exhibited considerable dimerization (Fig. 6h, panel ii). This observation suggests that disulfide

bonds within the transmembrane domain are not essential for *cis* dimerization at least in some sDscams. A further mutation experiment showed that cysteine residue mutation in the transmembrane domain of sDscam $\beta$ 6v2 did not markedly affect the formation of *cis*-multimers in both the  $\beta$ 6v2 and  $\beta$ 6v2 $\Delta$ Ig1–3 constructs (Supplementary Fig. 6g, panel ii). Collectively, these results demonstrate that the transmembrane domain of each sDscam mediated *cis* multimerization, likely via a noncovalent mechanism.

### **Coexpression of multiple sDscam isoforms diversify homophilic specificities**

Finally, because all sDscam $\alpha$  isoforms and some of sDscam $\beta$ s mediated homophilic *trans* bindings (Fig. 1d) and interacted with each other in *cis* without specificity (Fig. 6), we tested how combinatorial expression of multiple sDscam isoforms diversified binding specificities. In all cases, cells coexpressing two sDscam $\alpha$  combinations failed to coaggregate with cells expressing two different sDscam $\alpha$  combinations. However, intermixed cell aggregates of cells that coexpressed identical sDscam $\alpha$  combinations were observed (Fig. 7a). Consistent with these observations, co-IP experiments showed different sDscam $\alpha$ s interacted strongly with each other when coexpressed (Supplementary Fig. 7b, lane 1-2). Similar data were obtained for each of the sDscam $\alpha$ / $\beta$  pairs (Fig. 7b, Supplementary Fig. 7b, lane 3-4). These results suggest that homophilic specificity by coexpressing two distinct isoforms depends on the identity of the isoform pair but not a single isoform. These results strongly suggest that sDscams interact *in cis* so as to create new homophilic specificities that differ from the specificities of the individual sDscam isoforms.

To further examine combinatorial homophilic specificities, we coexpressed distinct sets of three sDscam isoforms, and then evaluated their ability to coaggregate with cells containing various numbers of mismatches (Fig. 7c). In all cases, only cells expressing identical isoform combinations formed intermixed coaggregates, while cells expressing mismatched isoforms displayed separate red and green aggregates (Fig. 7c). Remarkably, even a single isoform common between cells coexpressing three isoforms and expressing one isoform caused separate red and green aggregates (Fig. 7c, panels 8-10). Taken together, these results strongly suggest that sDscam isoforms evolved a unique combinatorial multimerization to diversify homophilic specificities.

## Discussion

Here, we provide compelling evidence that different combinations of sDscam isoforms interact *in cis* to significantly expand homophilic *trans* recognition specificities in Chelicerata. Specifically, we showed that sDscam isoforms form promiscuous *cis*-multimers involving the membrane-proximal FNIII1–3 and transmembrane domains at the cell surface that associate specifically *in trans* via Ig1/Ig1 self-binding. Thus, our data revealed that Chelicerata sDscams mediated highly isoform-specific homophilic interactions via a “hybrid” mechanism between fly Dscam1 and vertebrate Pcdhs. Below, we discuss the molecular basis of the homophilic interactions of sDscam isoforms, and the implications of sDscam architecture in neuronal self-recognition and non-self-discrimination, with particular emphasis on comparison to fly Dscam1 and vertebrate Pcdhs.

### Chelicerata sDscams form high order *cis*-multimers

Our data clearly indicate that sDscam isoforms could form robust *cis*-multimers even in the absence of *trans* interactions (Fig. 6). This is supported by several lines of independent evidence that distinct sDscam isoforms from different clusters can be coimmunoprecipitated (Fig. 6b, Supplementary Fig. 6a), and that sDscams are present in high-molecular-weight, detergent-solubilized assembly complexes from scorpion cephalothorax (Fig. 6d, panel ii). In addition, we observed altered recognition specificity when multiple sDscam isoforms were coexpressed (Fig. 7a-c), further supporting their *cis* multimerization. Such *cis* multimerization of Chelicerata sDscams is in sharp contrast to that of fly Dscam1, which appear interacts as *cis* monomers. Although the individual orthologue of FNIII1–3 domains in Chelicerata sDscams is present at the membrane-proximal region of fly Dscam1, the overall structure of the membrane-proximal region might be reconstituted in evolutionary transitions from classical Dscam to shortened sDscams. Because sDscam originated from classical Dscam after Chelicerata speciation<sup>14, 33</sup>, sDscam *cis* multimerization might be in large part the result of evolutionary co-adaptation of these membrane-proximal domains as a *cis* interaction interface for combinatorial recognition specificity.

Although Chelicerata sDscams form *cis*-multimers like Pcdh isoforms, they differ in at least two major aspects. Firstly, Chelicerata sDscams form *cis*-multimers via a *cis* interaction interface distinct from Pcdhs. The latter form *cis* dimers mediated by membrane-proximal EC6 or both EC5 and EC6<sup>23, 24, 25, 29</sup>. By contrast, the formation of sDscam *cis*-multimers might be mediated by combining membrane-proximal FNIII1–3 and transmembrane domains (Fig. 6f-h). Although individual recognition sites located in the extracellular and transmembrane domains alone might engage in the formation of *cis*- multimers, a long-range *cis* interface

encompassing the FNIII1 to transmembrane domains could assure the accuracy and efficiency of *cis* multimerization. Thus, the sDscam *cis* interface involves a much larger proportion of the extracellular region than vertebrate Pcdhs. This discrepancy in the *cis* interface may at least in part account for the markedly different *cis* multimerization ability of Pcdhs and sDscams, whereas a  $\gamma$ -Pcdh lacking EC1–3 domains interacted weakly<sup>22</sup> while sDscams lacking Ig1–3 domains exhibited robust *cis* multimerization for the one sDscam $\alpha$  and six sDscam $\beta$  subfamilies tested (Fig. 6, Supplementary Fig. 6).

Furthermore, sDscams formed more complex *cis*-multimers than Pcdhs. Although  $\gamma$ -Pcdhs reportedly form *cis* tetramers<sup>22</sup>, it is generally recognized that Pcdhs form *cis*-dimers, as evidenced by dimerization of truncated Pcdhs lacking the EC1 or EC1–2 domain in solution<sup>25, 29</sup>. By contrast, our evidence showed that sDscams assembled into *cis*-dimer, tetramer, and even higher-order oligomeric complexes (Fig. 6, Supplementary Fig. 6). Therefore, sDscams seem to exhibit more efficient and complex *cis* multimerization than Pcdhs, presumably due to their larger interaction interface.

### **sDscams mediate highly specific homophilic recognition via self-binding variable Ig1**

We showed that all sDscam $\alpha$  isoforms can mediate homophilic interactions (Fig. 1d, 3b-f, Supplementary Fig. 3a), while a majority of sDscam $\beta$ 1– $\beta$ 6 isoforms does not interact homophilically (Fig. 1d). However, sDscam $\beta$  chimeric constructs (i.e, sDscam $\beta$ 4v1) produced by deleting or replacing their partial constant region mediated homophilic interactions (Fig. 2c, panels xv and xvi; Supplementary Fig. 2a, panel 15-17; Fig. 2f, panel i and ii), indicating that the failure in homophilic recognition is not due to incompatibility of the *trans* self-binding

interface. Thus, it seems likely that at least some of these sDscam $\beta$ s mediate self-recognition, although the mechanism is not yet understood. Alternatively, because sDscam *cis*-multimer assembly resembles the structures of antibody and T-cell receptor (TCR) in vertebrate, both comprising N-terminal variable Ig domains and a C-terminal constant domain, it is likely that scorpion sDscam isoforms participate in heterophilic binding with other proteins or pathogens as vertebrate antibody and TCR. Moreover,  $\sim 100$  sDscam isoforms in scorpion could potentially form a repertoire of  $10^{8-12}$  structurally variable assemblies, which is compatible with the order of magnitude of the diversity of antibodies in vertebrates. Notably, pancrustacean Dscam1 isoforms play an immune-protection role in bacterial challenge<sup>42, 43, 44</sup>. Given the extraordinary diversity and high structural similarity between Chelicerata sDscam and vertebrate antibody and TCR, it is attractive to speculate that sDscam diversity plays a role in invertebrate immunity.

Based on structural modeling and mutagenesis experiments, we demonstrate that sDscam homophilic specificity is determined by an antiparallel Ig1/Ig1 self-binding (Fig. 5a, b). Because the Ig1 domain of Chelicerata sDscams is orthologous to the Ig7 of fly Dscam1, it is reasonable that they have an identical antiparallel self-binding architecture. Indeed, site-directed swapping mutagenesis revealed that Ig1 of Chelicerata sDscams shared several key specificity-determining residues with Ig7 of fly Dscam1 isoforms<sup>37, 38</sup> (Fig. 5c, d, Supplementary Fig. 5). However, the homophilic specificity of fly Dscam1 is determined via three independent antiparallel self-binding modules, Ig2/Ig2, Ig3/Ig3, and Ig7/Ig7 (Fig. 8)<sup>37, 38</sup>, which can assemble in different combinations to generate a repertoire of tens of thousands of self-binding interfaces. By contrast, Ig1/Ig1 self-binding of Chelicerata sDscams only

generated ~ 100 distinct *trans* interfaces. If Chelicerata sDscams use the same neuronal self-recognition mechanism as fly Dscam1, this number is not sufficient to discriminate self from non-self<sup>11</sup>. Therefore, *trans* homophilic interactions in Chelicerata sDscams likely proceed via a mechanism distinct from that of fly Dscam1.

By contrast, sDscam-mediated self-recognition is analogous to that of Pcdhs, which is mediated by a mechanism coupling *cis* and *trans* interactions<sup>22, 23, 24, 25, 29</sup>. In vertebrate Pcdhs, ectodomains recognize each other via variable EC1/EC4 and EC2/EC3 *trans* homophilic interactions<sup>23, 24, 25, 26, 27, 28, 29</sup>. Compared with the four EC domain-mediated *trans* interfaces in Pcdhs, the Chelicerata sDscam recognition interface contains only one Ig1 domain (or possibly with Ig2). Considering the fact that sDscams have a smaller proportion of *trans* interfaces, albeit with a larger *cis* interface, than Pcdhs, we speculate that stronger *cis* multimerization of sDscams compensates for their smaller *trans* adhesive interface to facilitate formation of stable *cis/trans* assembly complexes.

### **Proposed model of sDscam interactions in self–non-self discrimination**

Based on a large body of experimental evidence and structural modeling, we propose that sDscams form promiscuous *cis*-multimers at the cell surface that associate specifically in *trans* via an independent Ig1 self-binding interface. Similar to mouse Pcdhs<sup>24, 25, 27, 28, 29</sup>, it is likely that full-length sDscam ectodomains in solution form a discrete array of multimers through specific *trans* dimerization of *cis* multimeric recognition units. However, as in Pcdhs<sup>23, 29</sup>, such a structure cannot explain neuronal self–non-self discrimination because neurons with many neurites encounter insufficient diversity for self-recognition. Obviously, this self-recognition

problem would be more severe for Chelicerata sDscams, which formed higher-order multimers than Pcdhs. Therefore, we speculate that Chelicerata sDscams could not adopt a discrete *trans* dimer of a *cis* multimeric assembly, but a zipper-like structure coupling *cis* and *trans* interactions like mouse Pcdhs<sup>24, 25, 26, 27, 28, 29</sup>.

However, in contrast to Pcdh *cis*-dimeric recognition units<sup>24, 25, 26, 27, 28, 29</sup>, sDscams can form *cis* tetramers and higher order multimers (Fig. 7d). Therefore, using sDscam *cis* tetramers as an example, we propose a two-dimensional latticed assembly structure model to account for sDscam-mediated cell-cell recognition (Fig. 7e). In this model, each sDscam *cis* tetramer could interact with multiple *cis* tetramers on apposed cell surfaces via independent *trans* Ig1/Ig1 self-binding, thereby forming a connected latticed assembly of proteins between cells. This model seems to be a “hybrid” structural framework between fly Dscams and vertebrate Pcdhs for Chelicerata sDscams, in which the Ig1/Ig1 self-binding *trans* interface is analogous to that of Ig7 of fly Dscams, while sDscam membrane-proximal *cis*-multimeric interfaces tended to largely resemble to that of vertebrate Pcdhs.

This model provides a reasonable explanation for how neurites discriminate self from non-self in Chelicerata, although detailed structures are not available. The presence of identical sDscam isoforms in two neurites of the same neuron would enable individual Ig1s of *cis*-multimers on apposed cell surfaces to self-bind each other independently of the composition of *cis*-multimers. Thus, the *trans* dimerization of *cis*-multimers could lead to a dense and connected lattice assembly between two apposing cell-surfaces, triggering strong homophilic interactions and inducing neurite repulsion (Fig. 7f). By contrast, because two neighboring neurons are incapable of expressing the same set of sDscam isoforms, mismatched Ig1s would



lead to a scattered or sparse connected lattice assembly between apposing cell surfaces, triggering weak homophilic interactions. Thus, the resulting downstream signaling is below the threshold level and fails to initiate neurite repulsion (Fig. 7f). This model provides an evolutionary rationale for the smaller isoform number in Chelicerata by at least two orders of magnitude than that in flies. Although there are only ~100 distinct sDscam isoforms in Chelicerata<sup>32</sup>, this vast repertoire of combinatorial recognition specificities is sufficient to provide each neuron with a unique identity to discriminate between self and non-self. The major challenge for future studies will be to develop genetic techniques for Chelicerata species through which the sDscam diversity in the nervous system can be artificially manipulated.

### **Chelicerata sDscams show more parallels with vertebrate Pcdhs than *Drosophila* Dscam1**

Our findings indicate that Chelicerata *sDscams* have striking parallels with *Drosophila Dscam1* and vertebrate *Pcdhs*, suggesting analogous roles (Fig. 8). Three encode large numbers of neuronal transmembrane protein isoforms; the individual isoforms are expressed stochastically and combinatorially, and the encoded proteins interact homophilically (Fig. 8)<sup>2,3,14</sup>. In addition, such striking isoform diversity appears to underlie neuronal self–non-self discrimination, at least for the well-characterized *Drosophila Dscam1* and vertebrate *Pcdhs*<sup>11, 12, 30, 31, 45</sup>. Our results support and extend the notion that different phyla used different molecules or mechanisms to underlie analogous principle for mediating self-recognition and self-avoidance during neuronal arborization (Fig. 8)<sup>1,2</sup>. It would be interesting to determine which molecules mediate self-avoidance in other invertebrate phyla in the evolutionary gap between arthropods

and vertebrates, particularly those lacking extensive Pcdh or Dscam diversity (e.g., the lancelet *Branchiostoma floridae*).

From an evolutionary viewpoint, Chelicerata sDscams are closely related with *Drosophila* Dscam1, but are not related with vertebrate Pcdhs<sup>3,33</sup>. However, in many respects, Chelicerata sDscams have more parallels with vertebrate Pcdhs (Fig. 8). Both are organized in a tandem array in the 5' variable region, encoding the same order of magnitude of isoforms (50~100) via alternative promoters. Both have a similar structural composition comprising six extracellular domains, a single transmembrane domain, and a cytoplasmic region. We have now shown that scorpion sDscam, like mouse Pcdhs, exhibited combinatorial recognition specificities based on the assembly of *cis*-multimeric recognition units, thereby sharing similar neuronal self-recognition logic with vertebrate Pcdhs. Thus, our findings further blur the distinction between the self-avoidance of invertebrates and vertebrates. It will be interesting to learn if convergent examples for self-avoidance in other animals are available. Finally, based on the remarkable parallels between Chelicerata sDscams and vertebrate Pcdhs, we wonder whether cadherins, in the animal kingdom, generate extraordinary isoform diversity via alternative splicing like their fly Dscam1 counterparts. One thing is certain—insight from extraordinary isoform diversity continues to deepen our understanding of basic biological principles.

## Methods

### Cell lines

Sf9 cells (a gift from Jian Chen, Zhejiang Sci-Tech University) were cultured in Sf-900™ II SFM (GIBCO, 10902088) supplemented with 10% fetal bovine serum (GIBCO, 10099141), and 1% Penicillin-Streptomycin (GIBCO, 15140163) at 27°C.

### Plasmid construction

DNA fragments encoding full-length sDscam isoforms or isoforms lacking the cytoplasmic domain were amplified by PCR using cDNA isolated from the scorpion *Mesobuthus martensii*<sup>33</sup>. PCR products were cloned into the pEasy-blunt zero cloning vector (TransGen Biotech, CB501-01) and ligated into the pFastBacHTB-mCherry/EGFP expression vector with appropriate restriction enzyme sites to guarantee that the opening reading frame was correct and the tags of EGFP and mCherry were fused to the C terminal of target proteins. To generate pFastBacHTB-mCherry and pFastBacHTB-EGFP vectors, the full-length mCherry amplified from the pmCherry-N1 vector (a gift from Xinhua Feng, Zhejiang University) and EGFP amplified from the pEGFP-N1 vector (a gift from Naiming Zhou, Zhejiang University) were inserted into the pFastBacHTB vector (a gift from Xiaofeng Wu, Zhejiang University) using the KpnI (forward primer) and HindIII (reverse primer) restriction sites. Domain deletion and substitution recombinant pFastBacHTB-mCherry vectors were made by using overlapping PCR. Extracellular-Myc-tagged sDscam vectors inserting the c-Myc (EQKLISEEDL) tag after the FNIII3 domain of sDscam were also generated by using overlapping PCR. The single mutation, double mutations and the mutations between close sDscam pairs were generated by site directed mutagenesis (Quikchange method). To obtain the pFastBac1-Myc/HA vector, sequences encoding the Myc (EQKLISEEDL) / HA (YPYDVPDYA) peptide were synthesized and annealed to form duple strand and then cloned into the pFastBac1 vector (a gift from Chuanxi Zhang, Zhejiang University) using restriction sites SphI and KpnI. pFastBac1-Myc truncations were obtained by using overlapping PCR. All recombinant vectors were confirmed by DNA sequencing. Ig and FNIII domain were predicted using the PROSITE (<https://prosite.expasy.org/>). Signal peptides (SP) and transmembrane domains (TM) were

predicted using SMART (<http://smart.embl-heidelberg.de/>). Primer sequences used for PCR amplifications will be provided upon request.

### **Antibody generation**

Mouse monoclonal antibody against *M. martensii* sDscam $\beta$ 6V2 (amino acids M1-L198) was generated by the Huabio.  $\beta$ 6V2 antigen was cloned into pET-28a and transformed into Rosetta (DE3) *E. coli*, and purified using Ni-NTA beads (Smart-lifesciences) according to standard protocol.

### **Recombinant baculovirus production**

Baculoviruses were obtained according to the manufacturer's instructions of Bac-to-Bac Baculovirus Expression System (GIBCO, 10359016). Briefly, to generate a recombinant bacmid, the pFastBac plasmid was transformed into DH10Bac competent cells (Biomed, BC112) and blue-white screening was used to pick the white colonies and recombinant bacmid DNA was analyzed by PCR. Recombinant bacmid was transfected into Sf9 cells using Lipofectamine 3000 Reagent (Invitrogen, L3000015). Cells were incubated at 27°C until see signs of viral infection. Then we harvested the virus from the cell culture medium to get P1 baculovirus. P1 viruses were added to Sf9 cells grown in the 6-well plates, after 72 h of incubation at 27°C, the cells were centrifuged to obtain the supernatant as P2 viruses. All baculoviruses should be stored at 4°C.

### **Cell aggregation assays**

Cell aggregation assay was performed as previously reported with little modification<sup>34</sup>. Sf9 cells grown in each well in 6-well plates were infected with P2 viral of target proteins tagged with mCherry or EGFP 10~30  $\mu$ l and incubated at 27°C for 3 days. Cells were suspended and transferred to the 2ml tube, centrifuged at 1,000rpm for 5 min. The supernatants were discarded, and the cell pellets were resuspended with the 1ml 1 $\times$ HCMF (1:10, Leagene Biotechnology, CC0073) gently and centrifuged at 1,000rpm for 5 min again. Cells were then resuspended with 1ml 1 $\times$ HCMF gently. For cell aggregation assay, 400 $\mu$ l cell suspension was transferred into

each well in 6-well plates containing 2ml 1×HCMF per well. For binding specificity assay, 200ul cell suspension of each sample was transferred into each well. The 6-well plates used in the cell aggregation assay firstly was added the 1%BSA in 1×HBSS (1:10, Gibco, 14185052) at 4°C overnight, then washed once with D-PBS and 2ml 1×HCMF was added to each well. Cell suspension in 6-well plates was incubated at 27°C with gyratory shaker (IKA KS260) at 60rpm for 30 min. Finally, images were captured using the Nikon Ti-S inverted fluorescence microscope.

### **Binding specificity assay for cells expressing single or multiple sDscam isoform(s)**

Differentially tagged sDscam isoforms were infected into Sf9 cells as described above. We observed that sDscam's surface expression is different among sDscam $\alpha$  or sDscam $\beta$  isoforms in the coexpression experiments. Thus, sDscam $\alpha$ -sDscam $\alpha$  or sDscam $\alpha$ -sDscam $\beta$  were used in appropriate ratio roughly guaranteed the approximate equal surface expression. Images were captured using the Nikon Ti-S inverted fluorescence microscope, and the aggregates containing red cells only, green cells only, and both red and green cells (Red-Green) were observed and counted for analysis of binding specificity.

### **Quantification of the size of cell aggregates using matlab**

The images of cells from three independent aggregation experiments were used to quantify the relative size of cell aggregates generated by each sDscam isoform. The images were first converted to black and white formats with 2160x2560 pixels. Objects with 1000 or fewer pixels were categorized as small (<10 cells), objects between 1000 pixels and 6000 pixels were categorized as medium (10 to 80 cells), and objects larger than 6000 pixels were categorized as large (>80 cells). The number of aggregates of each size category was then counted for analysis.

### **Immunostaining**

Sf9 cells were seeded onto the coverslips (WHB Scientific) coated with 1mM poly-L-lysine (Sigma, P6282) in 6-well plates, and were infected by the viruses from the P2 stocks of sDscam $\alpha$ 14 $\Delta$ cyto, sDscam $\beta$ 4v3 $\Delta$ cyto and sDscam $\alpha$ 14 $\Delta$ cyto $\Delta$ Ig1, these sDscam proteins

inserted c-Myc tag between the FNIII3 and TM domain as well as carried a mCherry tag at the C terminus. after 72hr, cells were fixed with 4% Paraformaldehyde Fix Solution (PFA, Sangon Biotech, E672002-0500) for 20min at room temperature, then these non-permeabilized cells were washed three times with D-PBS (Sangon Biotech, E607009). Cells were blocked with 5% BSA in PBS and incubated with anti-Myc tag monoclonal antibody (1:400, Earthox, E022050-01) overnight at 4 °C. Subsequently, cells were washed three times with PBS, incubated with goat Anti-Mouse IgG (H+L) Dylight488 (1:500, Earthox, E032210-01) diluted in 5% BSA of D-PBS for 1~2 h at room temperature and then washed three times with D-PBS. Finally, cell was stained by Hoechst (2µg/ml, invitrogen, Hoechst 33342) for 15~30 min for nucleus staining and imaging with a laser scanning confocal microscope LSM800 (Carl Zeiss).

### **Co-immunoprecipitation and western blot analysis**

Sf9 cells grown in 6-well plates were infected with viral and incubated for 3 days at 27°C. Cells were lysed in the IP lysis buffer (Thermo Fisher Scientific, 87787). The cells were incubated in lysis buffer for 30 min at 4°C. The supernatant was collected by centrifugation at 13,000 g for 20 min at 4°C. Subsequently, cellular extracts were incubated with appropriate antibodies at 4°C overnight, followed by incubating with pre-washed protein A/G magnetic beads (Thermo Fisher Scientific, 88802) for 3 h at 4°C. The beads were collected and washed, then boiled with SDS sample buffer (Sangon Biotech, C508320-0001) for 10 min. The beads were separated and then the supernatant was saved for western blotting according to the standard methods. In brief, proteins were electrophoresed in Tris-Glycine gel (Sangon Biotech, C651101-0001) and transferred to the PVDF membranes (Millipore, IPVH00010). Membranes were incubated with antibodies as described and then performed protein signal detection. For multimer detection of sDscam, target proteins in Sf9 cell and tissues were extracted using the RIPA lysis buffer (strong) (Cowin Biosciences, CW2333S) freshly supplemented with 1% protease inhibitor cocktail. The sample was treated with nonreducing sample buffer (Sangon Biotech, C516031) without boiling then directly centrifuged at 13,000rpm for 20 min at 4°C. The proteins were electrophoresed in Tris-Glycine PAGE gel (Sangon Biotech, C651104-0001). Then the western blotting was performed as described above. The anti-Mma β6V2 monoclonal antibody (produced by Huabio,

Hangzhou) raised against the Ig1 domain of Mma  $\beta$ 6V2 was used by tissue western blotting.

The antibodies used in IP: anti-HA Tag rabbit polyclonal antibody (1:50, Earthox, E022180-01), HA-Tag (C29F4) rabbit mAb (1:50, Cell Signaling Technology, 3724S), anti-GFP rabbit polyclonal antibody (1:50, Earthox, E022200-01). The primary antibodies used in Western blotting: anti-HA Tag monoclonal antibody (1:5000, Earthox, E022010-01), anti-Myc Tag antibody (1:5000, Earthox, E022050-01), anti-mCherry Tag antibody (1:5000, Earthox, E022110-01), anti-GFP Tag mouse monoclonal antibody (1:5000, Earthox, E022030-01), Anti-sDscam $\beta$ 6V2 Monoclonal Antibody (1:1000). The secondary antibodies used in Western blotting: HRP AffiniPure goat anti-Mouse IgG (1:8000, Earthox, E030110-01).

### **Homology modeling and protein-protein docking**

Ig1 homodimeric models of sDscam were built with swiss-model (<https://www.swissmodel>) using Dscam Ig7 as a temple<sup>39,40,46</sup>. Macromolecular interface was furthermore explored using PDBePISA ([https://www.ebi.ac.uk/msd-srv/prot\\_int/cgi-bin/piserver](https://www.ebi.ac.uk/msd-srv/prot_int/cgi-bin/piserver))<sup>47</sup>, the results show some buried residues and their potential interaction (hydrogen/disulphide bond, salt bridge or covalent link), single and double complementary mutations of these candidate residues were conducted upon this. Specificity-determining residues of six sDscam $\alpha$  pairs were screened also based on homology modeling. Similarly, TM domain of sDscam $\beta$ 6v2 was generated by swiss-model, and all these structure figures were prepared with VMD package (<https://www.ks.uiuc.edu/Research/vmd/>). In addition, Ig3-FNIII3 domain of sDscam $\beta$ 6v2 was predicted as monomer by swiss-model and then was used for homologous dimer docking by ZDOCK server (<http://zdock.umassmed.edu/m-zdock/>). Finally, the dimer interface were visualized with the PyMOL package ([www.pymol.com](http://www.pymol.com)).

### **Sequence alignments and heatmap analysis**

Multi-sequence alignments of Ig1 and Ig1-2 domains of the sDscam were carried out with Clustal Omega (<https://www.ebi.ac.uk/Tools/msa/clustalo/>) and Align (<https://www.uniprot.org/align/>). Then the sequence similarity heatmap was made by R language.

## **Statistics**

Statistical significance was calculated by using IBM SPASS Statistics V22.0 (Mann-Whitney U-test) to determine significant difference of cell aggregation size between TM domains shuffled isoforms, as well as  $\beta 6v2FL$ -Cherry and  $\beta 6v2\Delta cyto$ -Cherry isoforms. The number of independent experiment of duplicates, the statistical significance, and the statistical test are indicated in each figure or figure legend where quantification is reported.

## **Author contributions**

YJ conceived of this project. FZ, GC, CD, GL, HL, and BX designed and performed the experiments; FZ, GC, CD, GL, and HL conducted cell aggregation assays and binding specificity assay; FZ, GC, CD and GL performed multimerization assay; GC conducted sDscam expression and antibody generation; GC, CD, GL, and FZ, performed co-immunoprecipitation and western blot analysis; FZ, SH and ZD performed homology modeling and protein-protein docking; YJ, FZ, BX, FS, YD and XY analyzed the data; YJ and FZ wrote the manuscript; all authors discussed the results and commented on the manuscript.

## **Acknowledgements**

This work was supported by research grants from the National Natural Science Foundation of China (31630089, 31430050, 91740104).



## References

1. Zipursky SL, Grueber WB. The molecular basis of self-avoidance. *Annu Rev Neurosci* **36**, 547-568 (2013).
2. Mountoufaris G, Canzio D, Nwakeze CL, Chen WV, Maniatis T. Writing, Reading, and Translating the Clustered Protocadherin Cell Surface Recognition Code for Neural Circuit Assembly. *Annu Rev Cell Dev Biol* **34**, 471-493 (2018).
3. Zipursky SL, Sanes JR. Chemoaffinity revisited: dscams, protocadherins, and neural circuit assembly. *Cell* **143**, 343-353 (2010).
4. Wojtowicz WM, Flanagan JJ, Millard SS, Zipursky SL, Clemens JC. Alternative splicing of Drosophila Dscam generates axon guidance receptors that exhibit isoform-specific homophilic binding. *Cell* **118**, 619-633 (2004).
5. Wojtowicz WM, Wu W, Andre I, Qian B, Baker D, Zipursky SL. A vast repertoire of Dscam binding specificities arises from modular interactions of variable Ig domains. *Cell* **130**, 1134-1145 (2007).
6. Hattori D, Millard SS, Wojtowicz WM, Zipursky SL. Dscam-mediated cell recognition regulates neural circuit formation. *Annu Rev Cell Dev Biol* **24**, 597-620 (2008).
7. Miura SK, Martins A, Zhang KX, Graveley BR, Zipursky SL. Probabilistic splicing of Dscam1 establishes identity at the level of single neurons. *Cell* **155**, 1166-1177 (2013).
8. Neves G, Zucker J, Daly M, Chess A. Stochastic yet biased expression of multiple Dscam splice variants by individual cells. *Nat Genet* **36**, 240-246 (2004).
9. Schmucker D, *et al.* Drosophila Dscam is an axon guidance receptor exhibiting extraordinary molecular diversity. *Cell* **101**, 671-684 (2000).
10. Sun W, *et al.* Ultra-deep profiling of alternatively spliced Drosophila Dscam isoforms by circularization-assisted multi-segment sequencing. *EMBO J* **32**, 2029-2038 (2013).
11. Hattori D, *et al.* Robust discrimination between self and non-self neurites requires thousands of Dscam1 isoforms. *Nature* **461**, 644-648 (2009).
12. Hattori D, Demir E, Kim HW, Viragh E, Zipursky SL, Dickson BJ. Dscam diversity is essential for neuronal wiring and self-recognition. *Nature* **449**, 223-227 (2007).
13. He H, *et al.* Cell-intrinsic requirement of Dscam1 isoform diversity for axon collateral formation. *Science* **344**, 1182-1186 (2014).
14. Jin Y, Li H. Revisiting Dscam diversity: lessons from clustered protocadherins. *Cell Mol Life Sci* **76**, 667-680 (2019).
15. Schmucker D, Chen B. Dscam and DSCAM: complex genes in simple animals, complex animals yet simple genes. *Genes Dev* **23**, 147-156 (2009).
16. Yagi T. Molecular codes for neuronal individuality and cell assembly in the brain. *Front Mol Neurosci* **5**, 45 (2012).
17. Wu Q, Maniatis T. A striking organization of a large family of human neural cadherin-like cell adhesion genes. *Cell* **97**, 779-790 (1999).
18. Wu Q, *et al.* Comparative DNA sequence analysis of mouse and human protocadherin gene clusters. *Genome Res* **11**, 389-404 (2001).
19. Ribich S, Tasic B, Maniatis T. Identification of long-range regulatory elements in the protocadherin-alpha gene cluster. *Proc Natl Acad Sci U S A* **103**, 19719-19724 (2006).
20. Tasic B, *et al.* Promoter choice determines splice site selection in protocadherin alpha

- and gamma pre-mRNA splicing. *Mol Cell* **10**, 21-33 (2002).
21. Wang X, Su H, Bradley A. Molecular mechanisms governing Pcdh-gamma gene expression: evidence for a multiple promoter and cis-alternative splicing model. *Genes Dev* **16**, 1890-1905 (2002).
  22. Schreiner D, Weiner JA. Combinatorial homophilic interaction between gamma-protocadherin multimers greatly expands the molecular diversity of cell adhesion. *Proc Natl Acad Sci U S A* **107**, 14893-14898 (2010).
  23. Thu CA, *et al.* Single-cell identity generated by combinatorial homophilic interactions between alpha, beta, and gamma protocadherins. *Cell* **158**, 1045-1059 (2014).
  24. Brasch J, *et al.* Visualization of clustered protocadherin neuronal self-recognition complexes. *Nature* **569**, 280-283 (2019).
  25. Goodman KM, *et al.* Protocadherin cis-dimer architecture and recognition unit diversity. *Proc Natl Acad Sci U S A* **114**, E9829-E9837 (2017).
  26. Goodman KM, *et al.* Structural Basis of Diverse Homophilic Recognition by Clustered alpha- and beta-Protocadherins. *Neuron* **90**, 709-723 (2016).
  27. Nicoludis JM, Lau SY, Scharfe CP, Marks DS, Weihofen WA, Gaudet R. Structure and Sequence Analyses of Clustered Protocadherins Reveal Antiparallel Interactions that Mediate Homophilic Specificity. *Structure* **23**, 2087-2098 (2015).
  28. Nicoludis JM, Vogt BE, Green AG, Scharfe CP, Marks DS, Gaudet R. Antiparallel protocadherin homodimers use distinct affinity- and specificity-mediating regions in cadherin repeats 1-4. *Elife* **5**, (2016).
  29. Rubinstein R, *et al.* Molecular logic of neuronal self-recognition through protocadherin domain interactions. *Cell* **163**, 629-642 (2015).
  30. Lefebvre JL, Kostadinov D, Chen WV, Maniatis T, Sanes JR. Protocadherins mediate dendritic self-avoidance in the mammalian nervous system. *Nature* **488**, 517-521 (2012).
  31. Mountoufaris G, *et al.* Multicluster Pcdh diversity is required for mouse olfactory neural circuit assembly. *Science* **356**, 411-414 (2017).
  32. Cao G, *et al.* A chelicerate-specific burst of nonclassical Dscam diversity. *BMC Genomics* **19**, 66 (2018).
  33. Yue Y, *et al.* A large family of Dscam genes with tandemly arrayed 5' cassettes in Chelicerata. *Nat Commun* **7**, 11252 (2016).
  34. Sasakura H, *et al.* Maintenance of neuronal positions in organized ganglia by SAX-7, a *Caenorhabditis elegans* homologue of L1. *EMBO J* **24**, 1477-1488 (2005).
  35. Bonn S, Seeburg PH, Schwarz MK. Combinatorial expression of alpha- and gamma-protocadherins alters their presenilin-dependent processing. *Mol Cell Biol* **27**, 4121-4132 (2007).
  36. Murata Y, Hamada S, Morishita H, Mutoh T, Yagi T. Interaction with protocadherin-gamma regulates the cell surface expression of protocadherin-alpha. *J Biol Chem* **279**, 49508-49516 (2004).
  37. Li SA, Cheng L, Yu Y, Chen Q. Structural basis of Dscam1 homodimerization: Insights into context constraint for protein recognition. *Sci Adv* **2**, e1501118 (2016).
  38. Sawaya MR, *et al.* A double S shape provides the structural basis for the extraordinary binding specificity of Dscam isoforms. *Cell* **134**, 1007-1018 (2008).
  39. Guex N, Peitsch MC, Schwede T. Automated comparative protein structure modeling

- with SWISS-MODEL and Swiss-PdbViewer: a historical perspective. *Electrophoresis* **30 Suppl 1**, S162-173 (2009).
40. Waterhouse A, *et al.* SWISS-MODEL: homology modelling of protein structures and complexes. *Nucleic Acids Res* **46**, W296-W303 (2018).
  41. Pierce BG, Wiehe K, Hwang H, Kim BH, Vreven T, Weng Z. ZDOCK server: interactive docking prediction of protein-protein complexes and symmetric multimers. *Bioinformatics* **30**, 1771-1773 (2014).
  42. Dong Y, Cirimotich CM, Pike A, Chandra R, Dimopoulos G. Anopheles NF-kappaB-regulated splicing factors direct pathogen-specific repertoires of the hypervariable pattern recognition receptor AgDscam. *Cell Host Microbe* **12**, 521-530 (2012).
  43. Li D, *et al.* Alternatively spliced down syndrome cell adhesion molecule (Dscam) controls innate immunity in crab. *J Biol Chem* **294**, 16440-16450 (2019).
  44. Watson FL, *et al.* Extensive diversity of Ig-superfamily proteins in the immune system of insects. *Science* **309**, 1874-1878 (2005).
  45. Chen WV, *et al.* Pcdhalphac2 is required for axonal tiling and assembly of serotonergic circuitries in mice. *Science* **356**, 406-411 (2017).
  46. Bienert S, *et al.* The SWISS-MODEL Repository-new features and functionality. *Nucleic Acids Res* **45**, D313-D319 (2017).
  47. Krissinel E, Henrick K. Inference of macromolecular assemblies from crystalline state. *J Mol Biol* **372**, 774-797 (2007).

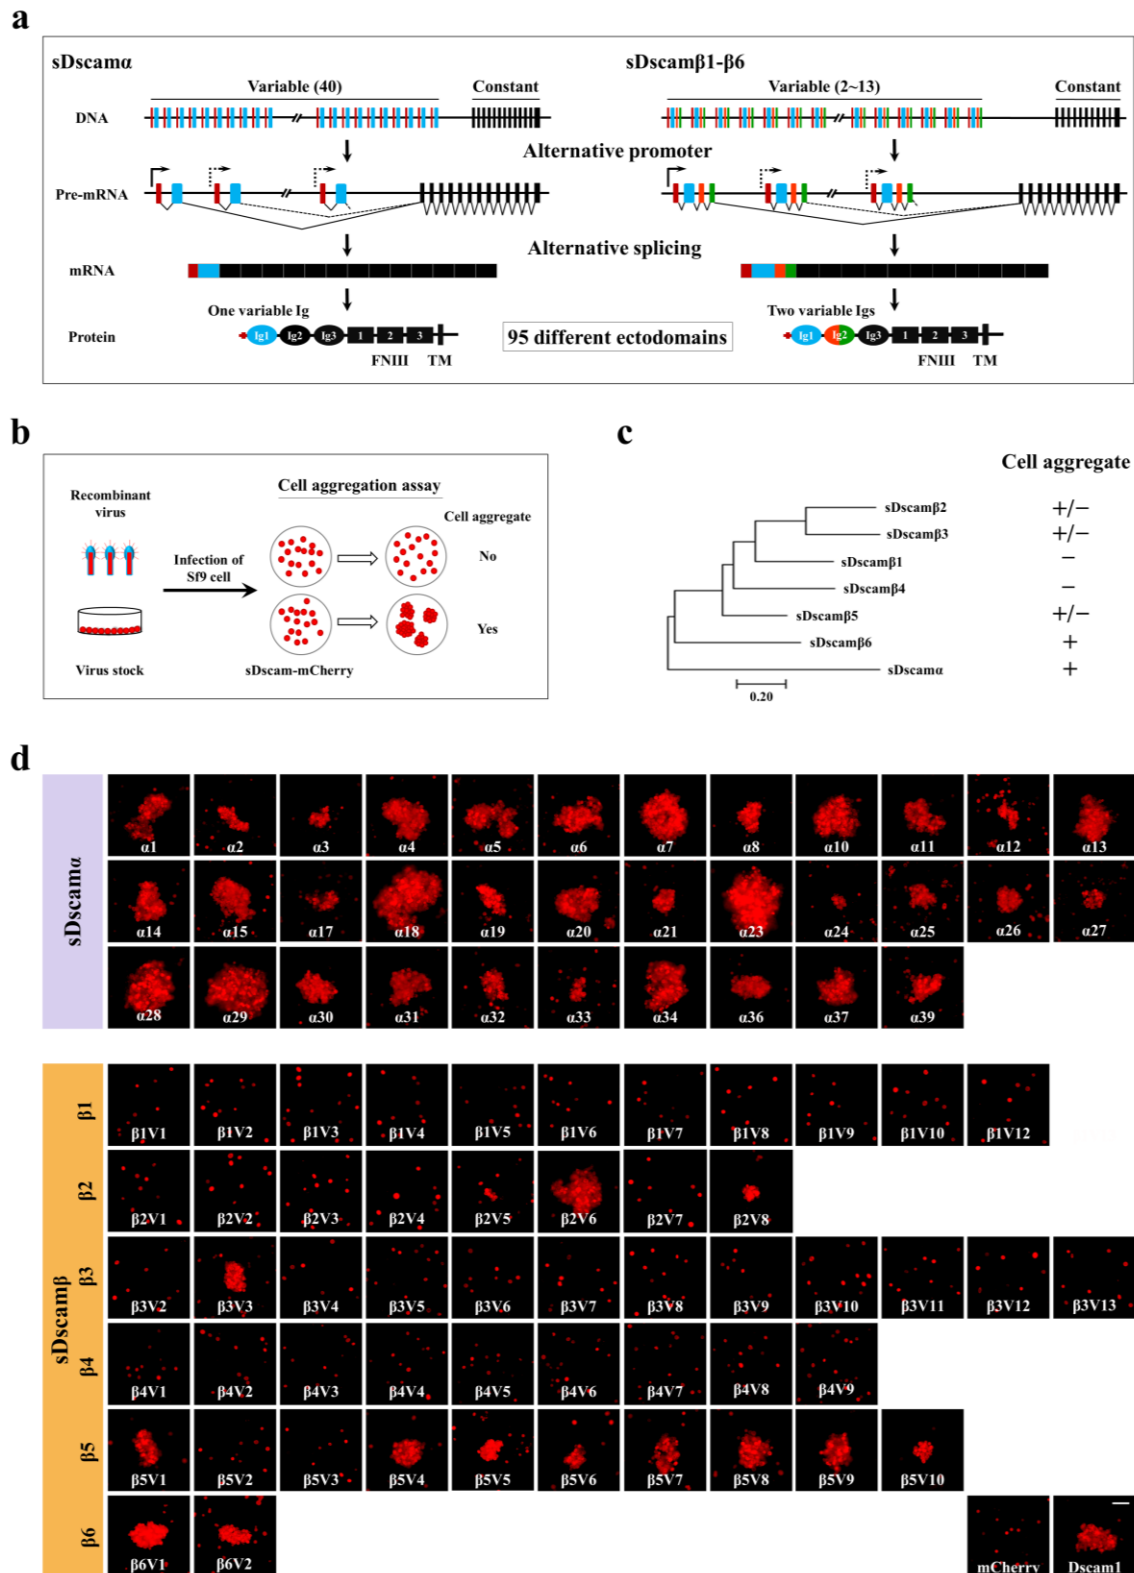

**Fig. 1 Cluster-wide analysis of sDscam-mediated homophilic binding in *M. martensii*.**

(a) Overview of the *M. martensii* sDscam gene clusters. Variable exons (coloured) are joined via *cis*-splicing to the constant exons (black) in sDscam $\alpha$  (left) and sDscam $\beta$ 1– $\beta$ 6 (right) subfamilies. Each variable cassette of sDscam $\alpha$  encodes Ig1 domain, while that of sDscam $\beta$

encodes Ig1–2 domains. The constant exons of sDscam $\alpha$  and sDscam $\beta$  encode the Ig2–3 or Ig3 domains, FNIII1–3 domains, the transmembrane and cytoplasmic domains.

**(b)** Schematic diagram of the cell aggregation assay. mCherry-tagged sDscam proteins were expressed in Sf9 cells for assaying their ability to form cell aggregates. As shown in the diagram, cells expressing some sDscam-mCherry alone did not aggregate as negative control - mCherry, while strong cell aggregates were observed with cells expressing other sDscam-mCherry as positive control Dscam1-mCherry.

**(c)** The summary of results for homophilic binding properties. An evolutionary relationship among distinct sDscam subfamilies is shown on the left.

**(d)** The outcome of cell aggregation of 85 sDscam isoforms when assaying individually. mCherry and fly Dscam1 isoform were expressed as negative and positive control. See also Supplementary Fig. 1b. Scale bar, 100  $\mu$ m.

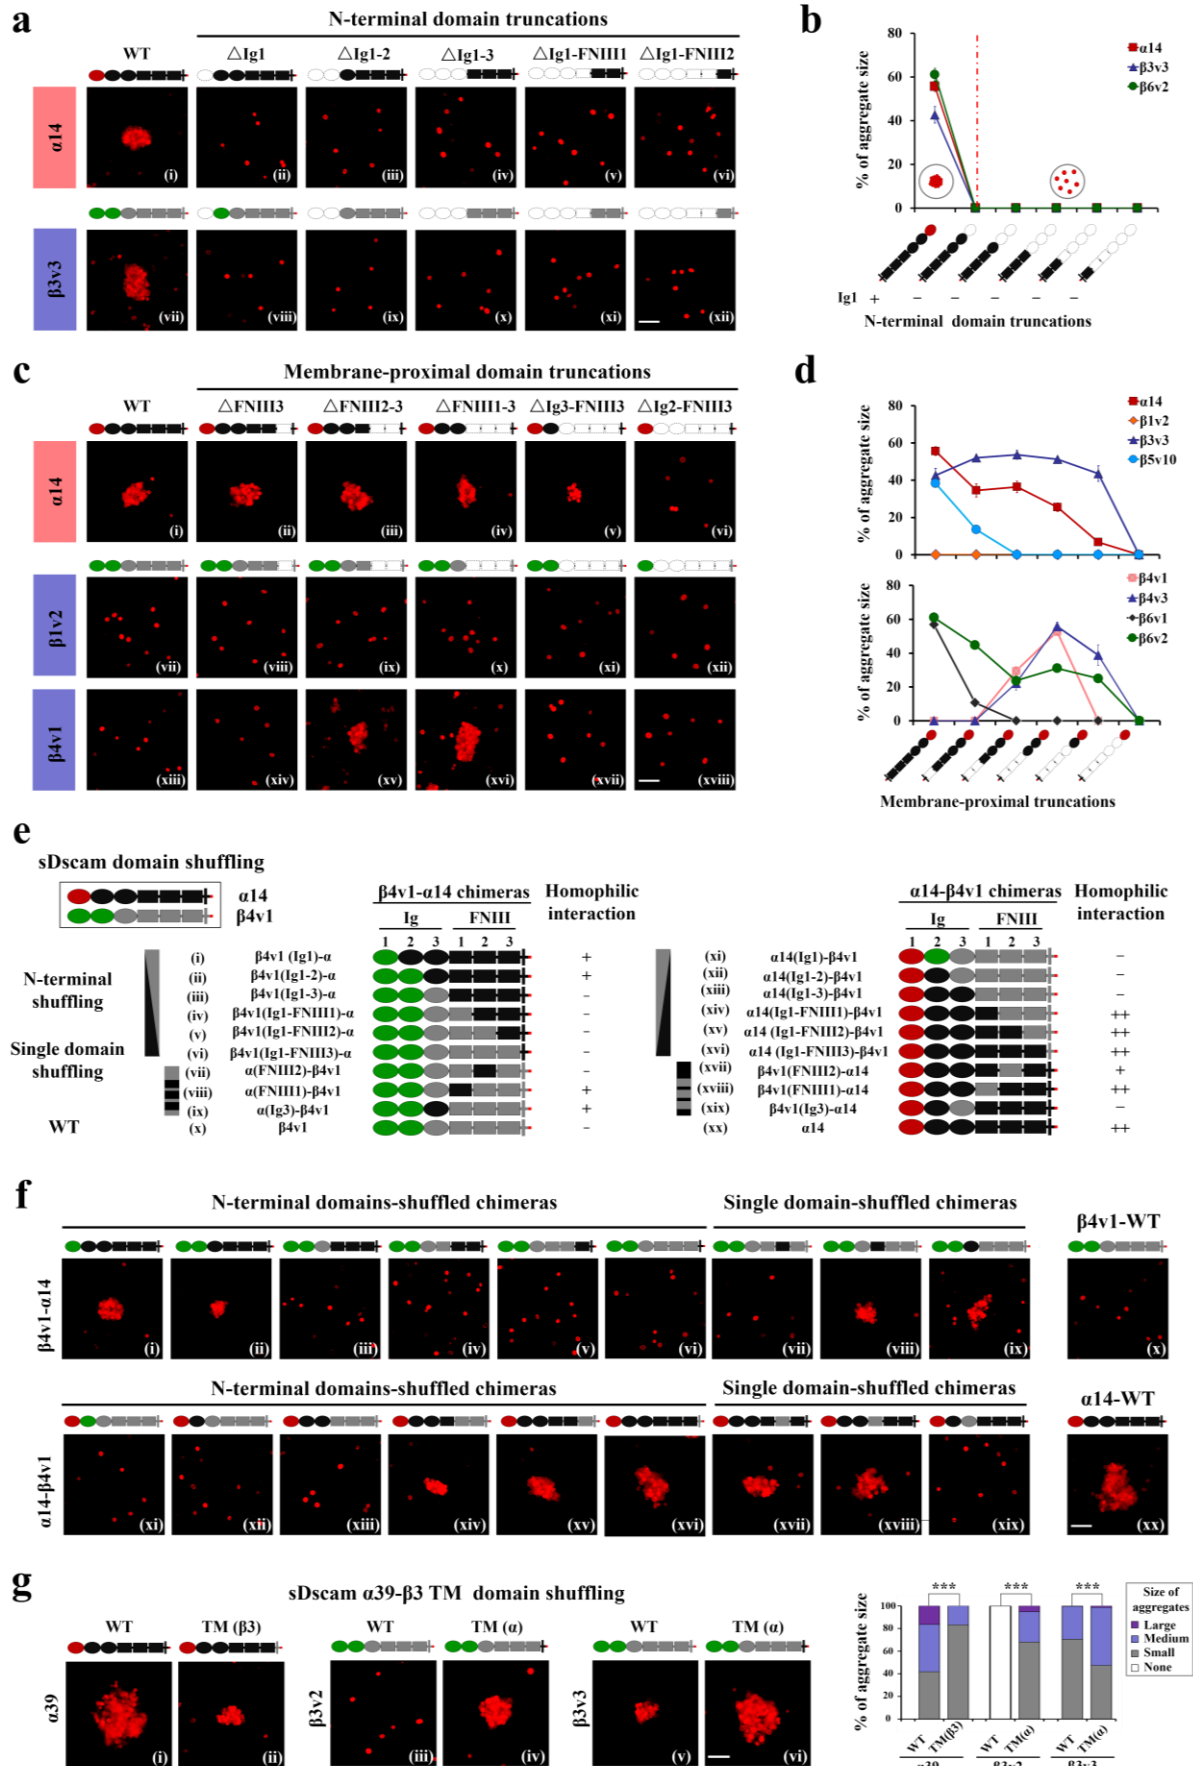

**Fig. 2 Homophilic *trans*-binding is associated with variable and constant domains of sDscam.**

(a) A series of N-terminal truncations of the extracellular domain of *sDscam* fused with mCherry were examined for cell aggregation assay. Three independent assays were performed in sDscam $\alpha$ 14, sDscam $\beta$ 3v3 and sDscam $\beta$ 6v2, respectively. All of the sDscam truncations lacking the N-terminal Ig1 domain failed to form cell aggregate. See also Supplementary Fig. 2a.

(b) The ratio change of cell aggregate size (medium and large) of sDscam N-terminal truncations. Results were obtained from three independent experiments and expressed as mean  $\pm$  SEM.

(c) The first two N-terminal domains are required for *trans* homophilic binding. Eight sDscam isoforms including 1 sDscam $\alpha$  and 7 sDscam $\beta$ s isoforms were deleted starting with the membrane-proximal FNIII3 domain, and these truncations were tested for cell aggregation. These data showed that all of the truncated constructs containing only one Ig1 domain failed to form cell aggregates, and the smallest truncations that exhibited binding ability contain N-terminal Ig1–2 domains. Supplementary Fig. 2a.

(d) Homophilic *trans*-binding is associated with constant extracellular domains of sDscam. The graph showed that cell aggregation size (medium and large) of many sDscam truncations changed obviously, except sDscam $\beta$ 1v1. See also Supplementary Fig. 2a. Results were obtained from three independent experiments and expressed as mean  $\pm$  SEM.

(e) Schematic diagrams for domain shuffling mutants used in the experiments, along with a summary of outcomes from homophilic interaction assays. Extracellular domain of sDscam $\alpha$ 14 (red and black) were replaced with the corresponding domains of sDscam $\beta$ 4v1 (green and gray), or vice versa. All of the chimeras bearing the Ig3–FNIII1 domain from sDscam $\alpha$ 14 (black) could affect cell aggregation. See also Supplementary Fig. 2b, c.

(f) Cell adhesion images were presented corresponding to the shuffled chimeras shown in Fig. 2e (i–xx). These results indicate that homophilic binding is regulated by constant extracellular domains of sDscam.

(g) The TM domain is associated with homophilic binding. TM domain shuffling experiments between sDscam $\alpha$ 39 and sDscam $\beta$ 3v2/v3 were performed. Right histograms show the



proportion of each category of the quantification of the cell aggregation corresponding to the shuffled chimeras (panels i–vi). Results were obtained from three independent experiments and expressed as mean. Mann-Whitney U-test was performed to determine significance. \*\*\* $p < 0.001$ . Scale bar, 100  $\mu\text{m}$ .



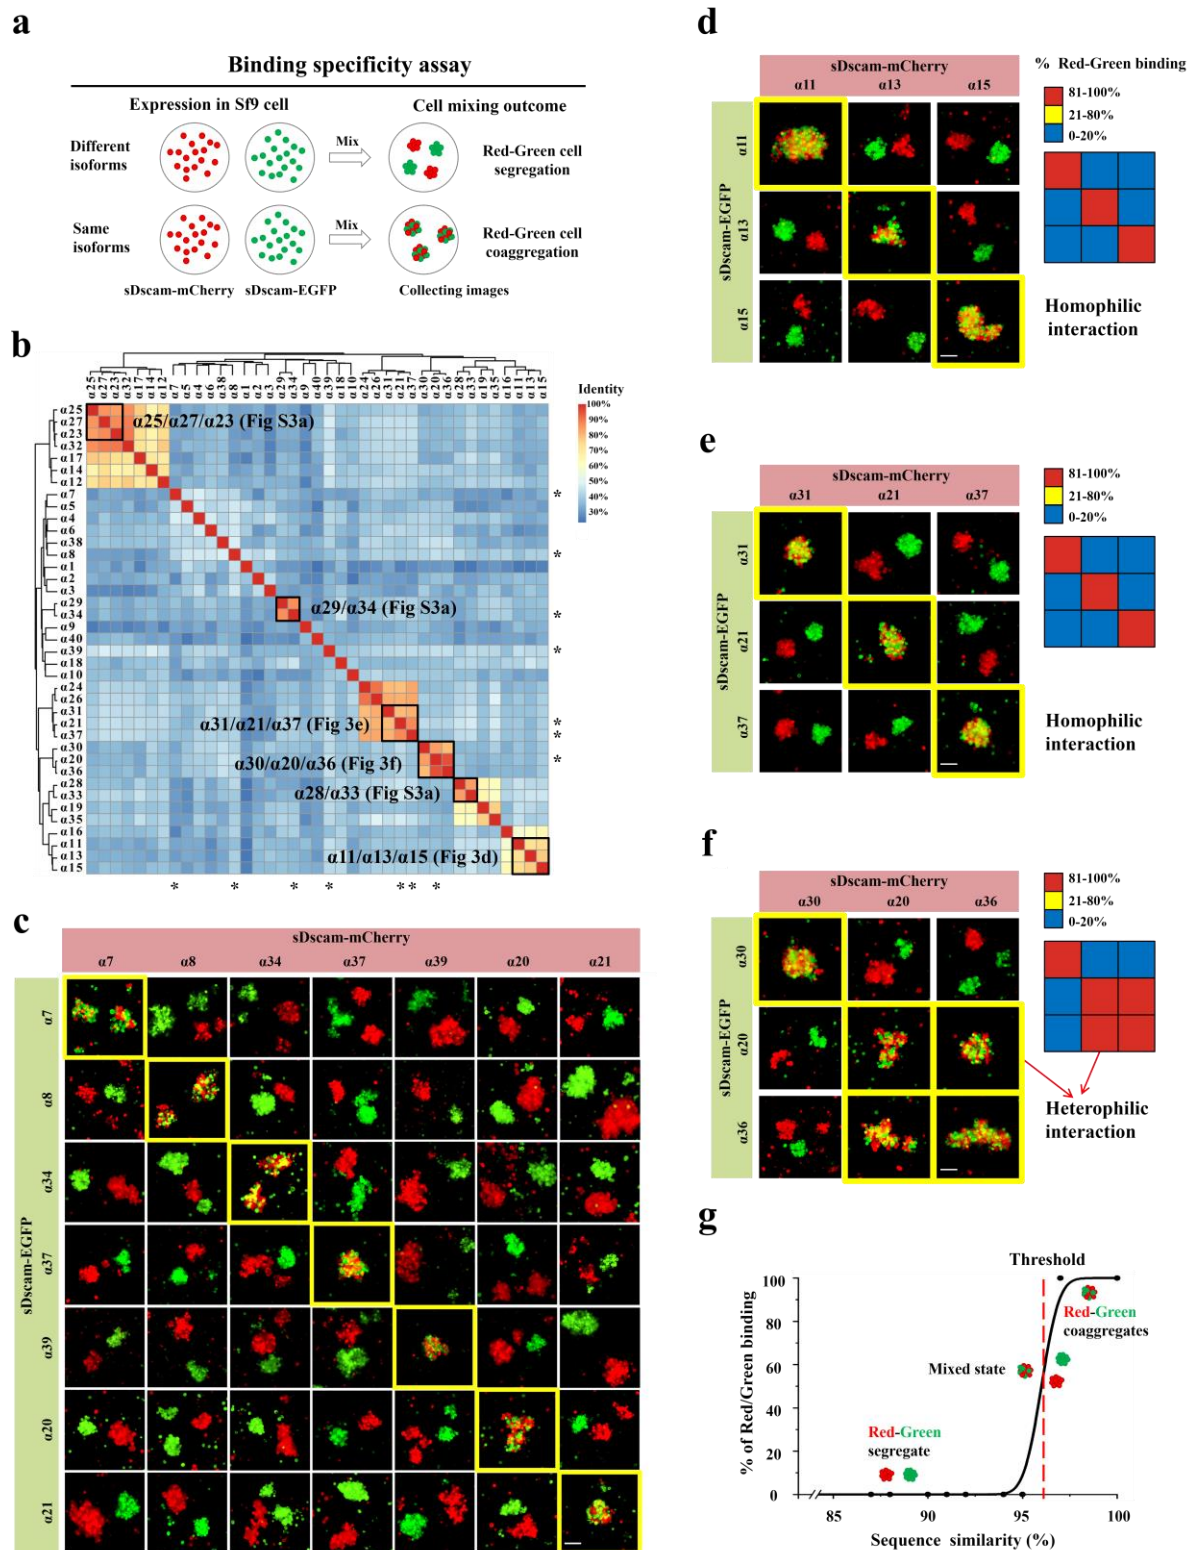

**Fig. 3 sDscam isoforms engaged in highly specific homophilic interactions.**

(a) Schematic diagram of the binding specificity assay. Cells expressing mCherry- or EGFP-tagged sDscam isoforms were mixed and assayed for homophilic or heterophilic binding. The outcome of cell aggregation included red-green cell segregation and red-green cell

coaggregation.

**(b)** Heat map of pairwise amino acid sequence identities of the Ig1 domains of sDscam $\alpha$  isoforms and their evolutionary relationship. Subsets of the isoforms marked by “\*” and within the boxed region were assayed in Fig. 3c–f. See also Supplementary Fig. 3a.

**(c–e)** sDscam $\alpha$  isoforms with sequence identity for nonself pairs ranging from 50% to 94% in their Ig domains display strict *trans*-homophilic specificity. Pairwise combinations within representative sDscam $\alpha$ s were assayed for their binding specificity. Scale bar, 100  $\mu$ m.

**(f)** Pairwise combinations within sDscam $\alpha$ 20&30&36 pairs were assayed for their binding specificity. sDscam $\alpha$ 36 exhibited strong heterophilic binding to sDscam $\alpha$ 20, but did not to sDscam $\alpha$ 30.

**(g)** Sequence identity of the Ig1 domains correlated with their binding specificity. Comparative analysis indicates that the thresholds for homophilic and heterophilic binding is set by ~96% sequence identity within their Ig1 domains between sDscam $\alpha$  pairs. Cell mixing outcome of different sDscam $\alpha$  pairs with sequence identity lower than threshold (~96%) showed red-green segregation, while red-green aggregation was observed in sDscam $\alpha$  pairwise combinations with sequence identity higher than threshold.

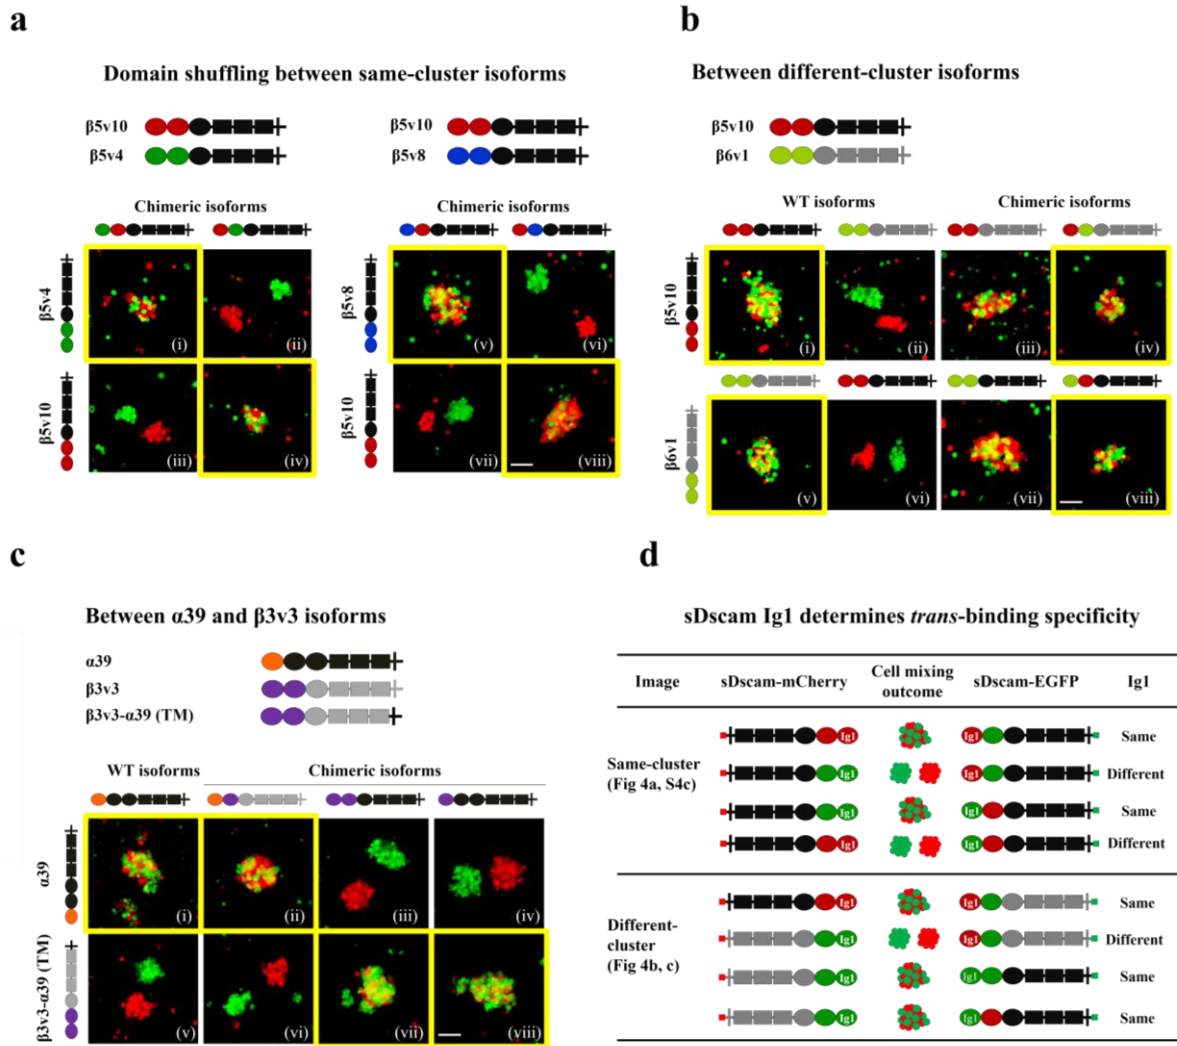

**Fig. 4 sDscam *trans*-binding specificity is largely dependent on N-terminal Ig1 domain.**

(a) Domain-shuffled chimeras of sDscam $\beta$ 5 isoforms and their parental counterparts were assayed for binding specificity. Chimeras in which either the Ig1 or Ig2 domains were replaced with the corresponding domains of cluster-within isoforms swapped or not swapped *trans*-binding specificity. See also Supplementary Fig. 4a, b.

(b) Swapped specificity was shown in sDscam $\beta$ 5v10 and sDscam $\beta$ 6v1 chimeras. These chimeras were replaced either the Ig1–2 or single Ig1/Ig2 domains with the corresponding domains of different cluster isoforms. See also Supplementary Fig. 4a, b.

(c) Domain-shuffled chimeras between sDscam $\alpha$  and sDscam $\beta$ 3 and their parental counterparts were assayed for binding specificity. See also Supplementary Fig. 4a, b.

(d) A summary of schematic of the domain-shuffled sDscam chimeras and their observed binding specificities. These data indicate that the presence of a single common Ig1 domain is

essential and sufficient to confer co-aggregation between sDscam isoforms. Scale bar, 100  $\mu\text{m}$ .

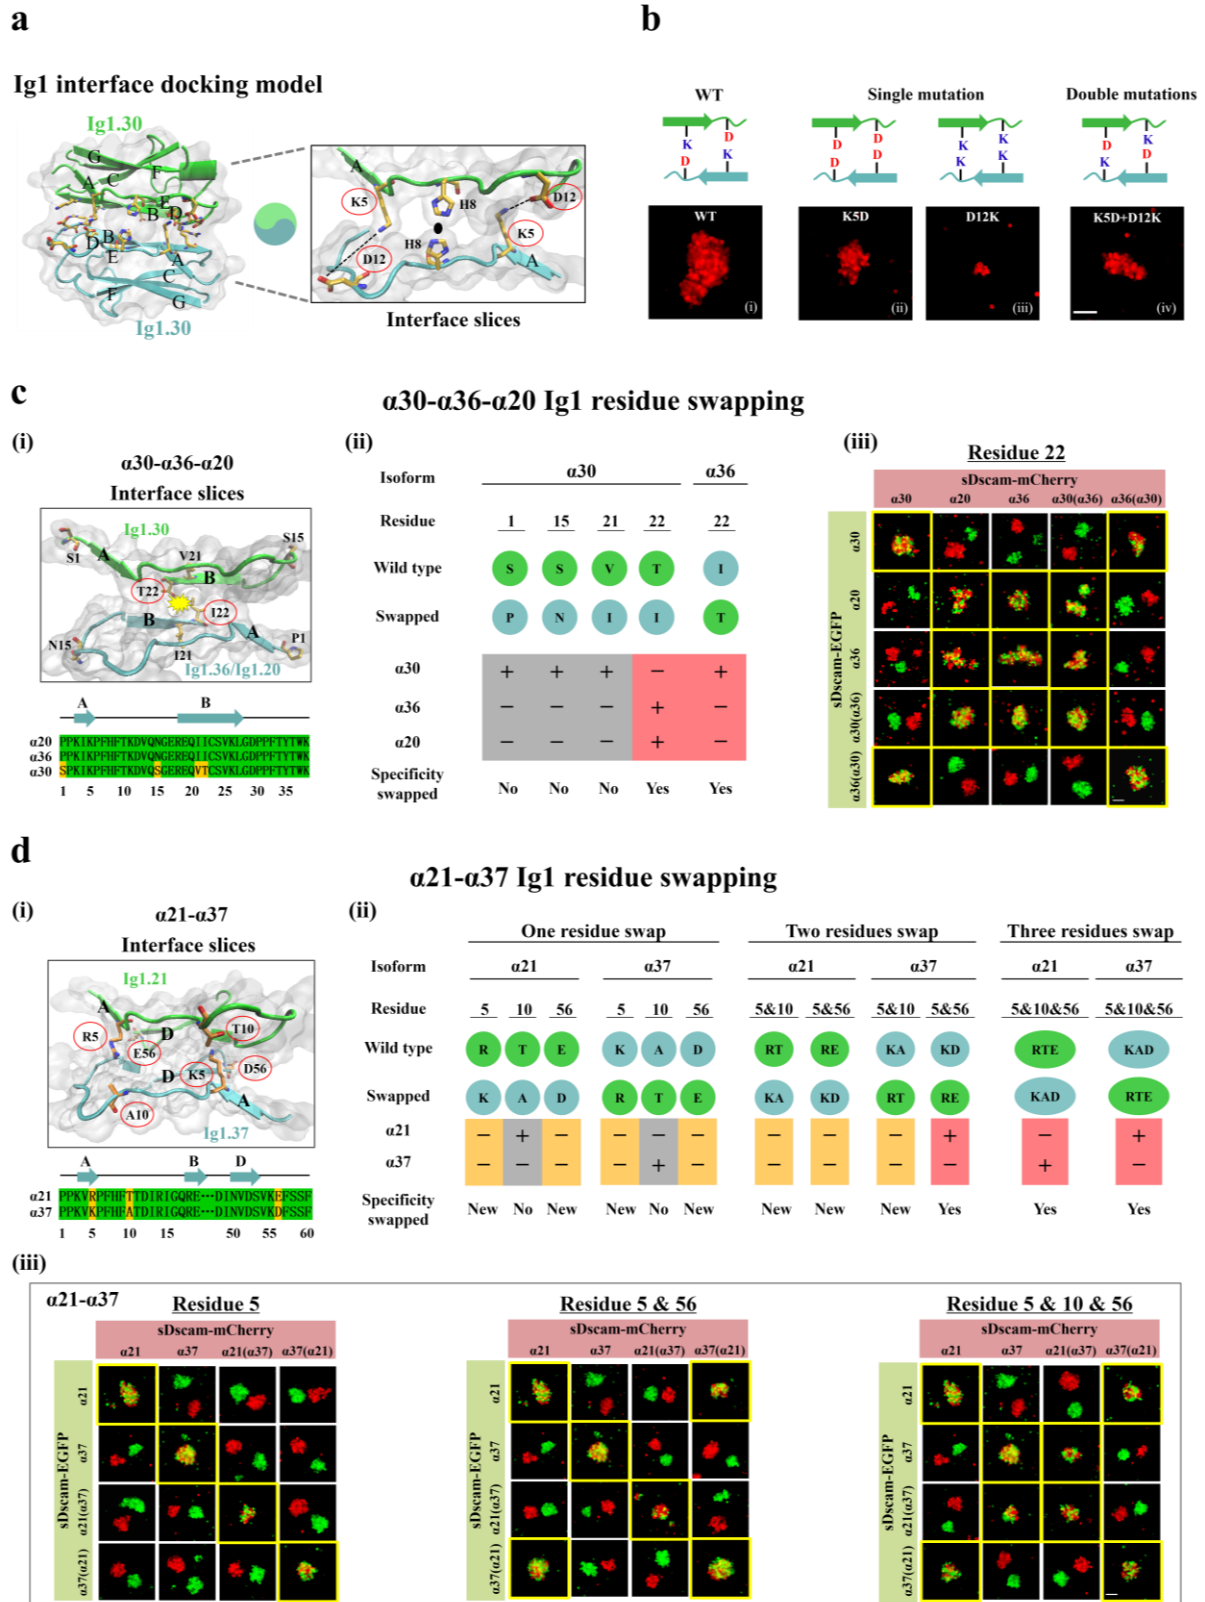

**Fig. 5 Identification of Ig1 specificity-determining residues.**

(a) Ig1.30 domain structural modeling. Structural modeling shows that Ig1.30 domain might interact in an antiparallel fashion. Left: The residues represented in licorices (light orange) have

been shown a complementary electrostatic potential surface pattern on the ABDE face: positive in one end, and negative in the other end. Right: Slices of the Ig1.30-Ig1.30 interface between strand A subunits. Potential neighboring interact residues (K5 and D12) were shown in licorices (light orange).

**(b)** The single disrupting and double complementary mutation of these candidate residues were assayed for cell aggregation. The double mutation partially rescued the reduced cell aggregates by single point mutations, supporting the antiparallel binding fashion.

**(c)** Residue swapping between sDscam $\alpha$ 20& $\alpha$ 30& $\alpha$ 36 to assess specificity-determining residues. Left: Ig1 docking model and sequence alignments of shuffled regions are shown on the panel i. Four candidate specificity-determining residues (light orange) were located on adjacent B strands. Middle: Panel ii shows schematic representation of residue swapping mutants used in the experiments, along with a summary of results from binding specificity. Right: Panel iii shows the binding specificity of isoforms containing wild-type and swapped residue 22. Swapping of residue S1, S15, and V21 in Ig1.30 to Ig1.36 did not swap *trans*-binding specificity (data not shown), while residue 22 swapping between Ig1.30 and Ig1.36 swapped binding specificity. See also Supplementary Fig. 5a.

**(d)** Residue swapping of variable Ig1 between sDscam $\alpha$ 21 and  $\alpha$ 37. Left panel (i) shows Ig1 docking model and sequence alignments of shuffled regions. Three candidate specificity-determining residues (light orange) were located on adjacent A and D strands. Right panel (ii) shows the schematic diagrams of residue swapping mutants used in the experiments, along with observed binding specificity. Lower panel (iii) shows cell aggregation assays of isoforms containing wild-type and residue-swapped Ig1 domains. Swapping of either one of three residues between in Ig1.21 to Ig1.37 did not swap binding specificity, and swapping of two of three residues between in Ig1.21 to Ig1.37 partially swapped binding specificity, and swapping of all three residues between in Ig1.21 to Ig1.37 fully swapped binding specificity. See also Supplementary Fig. 5g. Scale bar, 100  $\mu$ m.



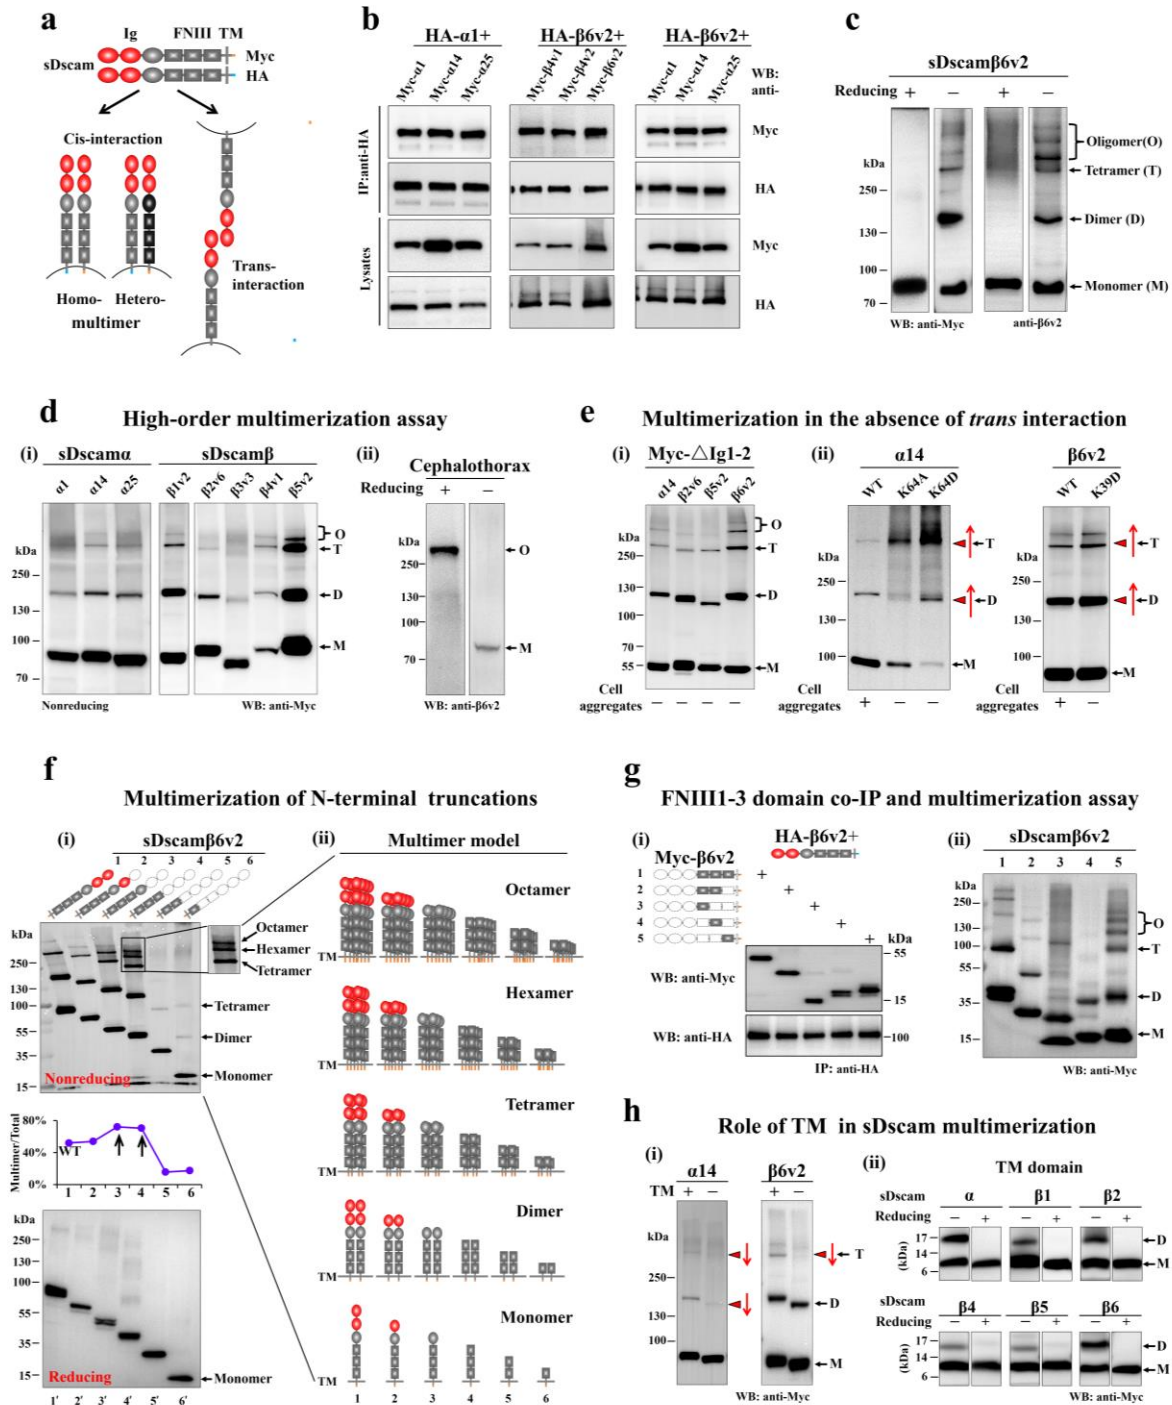

**Fig. 6 sDscams form high order *cis*-multimers mediated by FNIII1–3 and TM domains.**

(a) Schematic of *cis*- and *trans*- interaction of sDscam. sDscam monomers interacted in a parallel fashion to form a homomultimer or heteromultimer complex, while *trans*-multimers are formed between two opposing cells in an antiparallel fashion.

(b) All sDscam $\alpha$  and sDscam $\beta$  isoforms tested interacted strongly with each other in co-IP experiments. Lysates from Sf9 cells cotransfected with sDscam $\alpha 1$ , sDscam $\beta 4v1$  and

sDscam $\beta$ 6v2 bearing a C-terminal HA-tag (HA- $\alpha$ 1, HA- $\beta$ 4v1 and HA- $\beta$ 6v2) and different Myc-tagged sDscam isoforms were immunoprecipitated using anti-HA antibody and probed with anti-Myc or anti-HA antibodies. See also Supplementary Fig.6a.

(c) sDscam $\beta$ 6v2 expressed in Sf9 cells formed *cis*-multimers. Lysates from Sf9 cells expressing sDscam $\beta$ 6v2 were run on SDS-PAGE in the presence of nonreducing or reducing agents, and analyzed by western blot with Myc antibody (lane 1-2), and with sDscam $\beta$ 6v2 antibody (lane 3-4).

(d) Multimerization assay of sDscam expressed in Sf9 cells (panel i) and from the scorpion cephalothorax (panel ii). Lysates from the scorpion cephalothorax were resolved on a SDS/PAGE gel under the nonreducing or reducing conditions, and analyzed by western blot with sDscam $\beta$ 6v2 antibody (panel ii).

(e) sDscams formed high order *cis*-multimers in the absence of *trans* interaction. (i) Proteins lacking Ig1-2, which have ablated homophilic *trans*-interactions, was able to form robust multimers. (ii) Single residue mutations (e.g.,  $\alpha$ 14K64A,  $\alpha$ 14K64D and  $\beta$ 6v2K39D), which ablated homophilic cell aggregation, caused increased multimerization.

(f) A series of N-terminal truncations of the extracellular domain of sDscam $\beta$ 6v2 fused with Myc-tag were examined for multimerization assay. Nonreducing (upper panel i) or reducing (lower panel i) SDS/PAGE gels were analyzed, with graph of the ratio change of multimer/total below nonreducing gel. Schematic architecture of *cis*-multimer was depicted on the right (panel ii). See also Supplementary Fig.6e.

(g) Co-IP and multimerization assay of FNIII1–3s. sDscam $\beta$ 6v2 interacted strongly with each truncated protein expressing individual or combined domain of FNIII1–3s (panel i), and each truncated protein could form strong *cis*-multimers (panel ii).

(h) Transmembrane domain promotes the formation of sDscam *cis*-multimers. TM domain deletion strikingly reduced sDscam multimerization (Downward red arrow, panel i). The TM peptides expressed from various sDscams could dimerize strongly (panel ii). See also Supplementary Fig.6g.



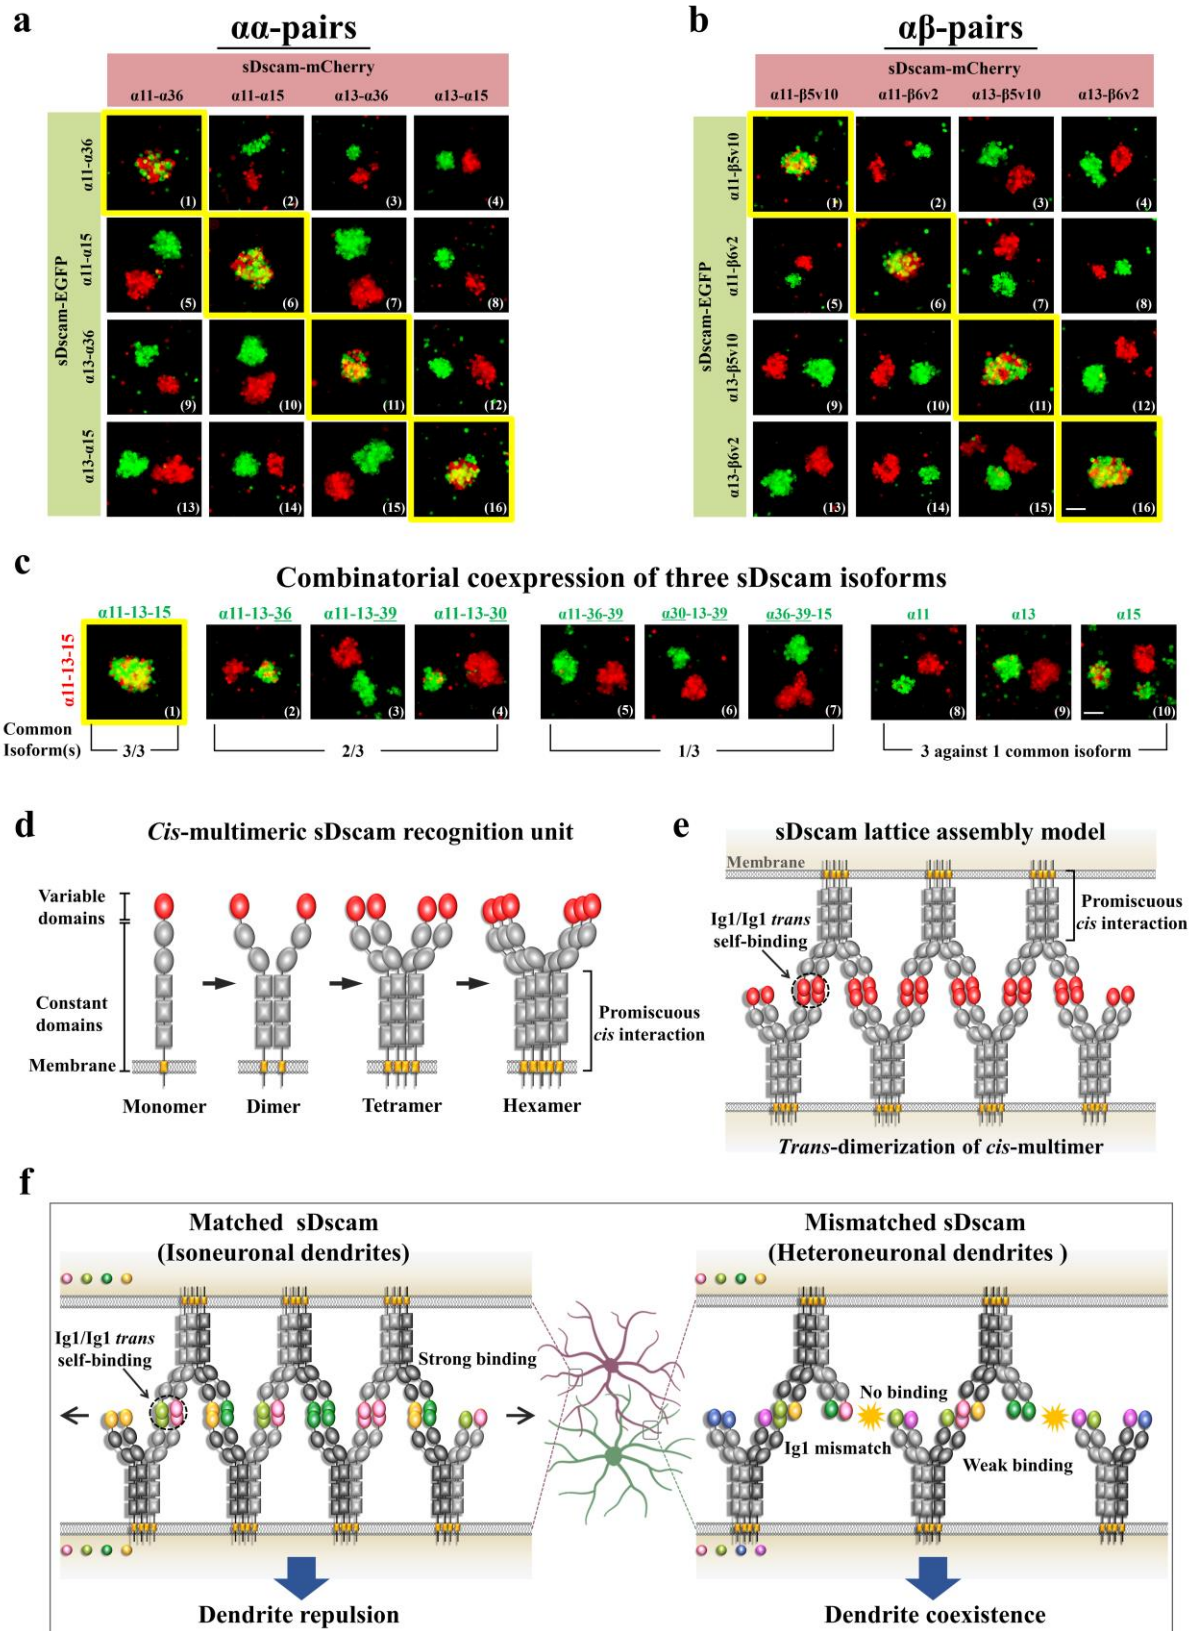

**Fig. 7** The model for sDscam-mediated cell-cell recognition.

(a, b) Combinatorial coexpression of multiple sDscam isoforms generates unique cell surface

identities. Cells coexpressing an identical or a distinct set of sDscam $\alpha$  (**a**) and sDscam $\beta$ 5– $\beta$ 6 isoforms (**b**) were assayed for coaggregation. See also Supplementary Fig.7a.

(**c**) Cells coexpressing three distinct mCherry-tagged sDscam isoforms were assayed for interaction with cells expressing an identical or a distinct set of GFP-tagged sDscam isoforms. The nonmatching isoforms between two cell populations are underlined. See also Supplementary Fig.7a. Scale bar used in (a–c), 100  $\mu$ m.

(**d**) Model of *cis*-multimeric sDscam recognition units. The *cis* interface is located on long-range region from FNIII1 to TM domains. Since all sDscam assembly sizes were the fold of dimer, we suggest that dimer might act as basic recognition units for sDscam, and then clustered into tetramer and higher orderly oligomeric complexes.

(**e**) The model for sDscam-mediated cell-cell recognition. In this model, each sDscam *cis*-tetramers could interact multiple *cis*-tetramers on apposed cell surfaces via independent *trans* Ig1/Ig1 self binding, thereby forming a connected latticed assembly of proteins between cells.

(**f**) The model of sDscam-mediated neuronal self-recognition and self–non-self discrimination. Due to identical sDscam isoforms in two neurites of the same neuron, the *trans*-dimerization of *cis*-multimers could lead to a dense and connected lattice assembly between two apposing cell surfaces, thus triggering strong homophilic interactions and then inducing neurite repulsion. In contrast, mismatched Ig1s between two neighbouring neurons lead to a scattered or sparse connected lattice assembly between apposing cell surfaces, triggering weak homophilic interactions. Thus, the resulting downstream signaling is below the threshold level and fails to initiate neurite repulsion.

## Convergent molecular strategies for self-avoidance

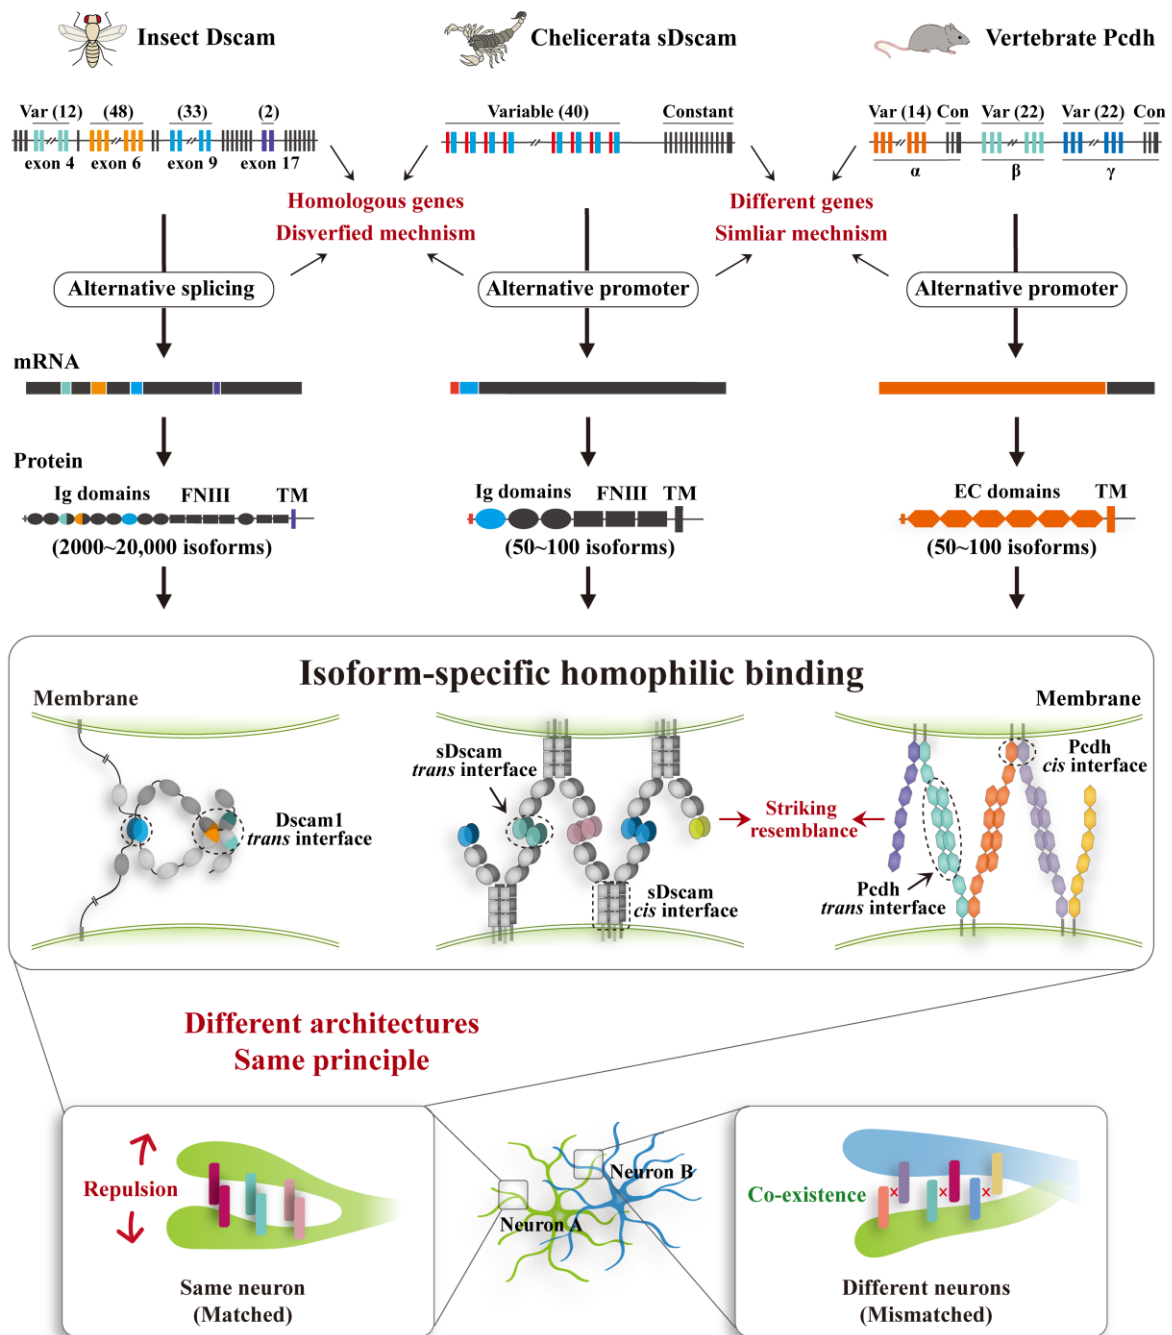

### Self-recognition: Distinguishing self from non-self

**Fig. 8** Chelicerata sDscams show more parallels with vertebrate Pcdhs than *Drosophila* Dscam1.

Chelicerata *sDscams* show more parallels with vertebrate *Pcdhs* than *Drosophila Dscam1*. *Drosophila Dscam1* generates ten thousands of protein isoforms through alternative splicing<sup>9</sup>. Chelicerata *sDscam* genes employ alternative promoter to generate extensive isoforms as vertebrate *Pcdhs*<sup>17, 33</sup>. Three of them encode a large number of single-transmembrane protein isoforms, and the encoded proteins engage in isoform-specific homophilic binding. This suggests that different phyla seem to have used different molecules to mediate analogous principle for self-recognition and self–non-self discrimination during neuronal arborization. However, in contrast to fly *Dscam1* isoforms which was shown to act as *cis*-monomer, *sDscam* and *Pcdh* proteins act as *cis*-multimeric recognition units to expand adhesive interfaces.
